# Supplementary material for: Proteomics and Machine Learning Approaches Reveal a Set of Prognostic Markers for COVID-19 Severity With Drug Repurposing Potential
Source: Front Physiol. 2021 Apr 27;12:652799. doi: 10.3389/fphys.2021.652799 (PMC8120435; doi:10.3389/fphys.2021.652799)
Supplement: Supplementary Table 2 — Clinical information of COVID-19 patients. [file Table_2.xlsx]

## Sheet: Clinical information
Supplementary Table S2 : Clinical information of all patients used in the study
Patient ID	Grouping	SARS-CoV-2 infection	Age	Sex	Ct Values	Severe clinical symptoms	On ventilation	Final Hospitalization Status
Label free quantification
25	Negative	Negative	50	M	N/A	No	No	Discharged
27	Negative	Negative	30	F	N/A	No	No	Discharged
50	Negative	Negative	18	F	N/A	No	No	Discharged
65	Negative	Negative	29	M	N/A	No	No	Discharged
66	Negative	Negative	75	M	N/A	No	No	Discharged
68	Negative	Negative	23	F	N/A	No	No	Discharged
94	Negative	Negative	20	M	NA	No	No	Discharged
102	Negative	Negative	28	M	N/A	No	No	Discharged
105	Negative	Negative	49	M	N/A	No	No	Discharged
112	Negative	Negative	55	M	N/A	No	No	Discharged
116	Negative	Negative	37	F	N/A	No	No	Discharged
118	Negative	Negative	35	M	N/A	No	No	Discharged
119	Negative	Negative	24	F	N/A	No	No	Discharged
122	Negative	Negative	86	M	N/A	No	No	Discharged
125	Negative	Negative	76	M	N/A	No	No	Discharged
129	Negative	Negative	20	M	N/A	No	No	Discharged
132	Negative	Negative	25	M	N/A	No	No	Discharged
135	Negative	Negative	38	F	N/A	No	No	Discharged
136	Negative	Negative	38	M	N/A	No	No	Discharged
148	Negative	Negative	32	M	N/A	No	no	Discharged
3	Severe	Positive	61	F	29/29	ARDS, Pneumonia	Yes	Death
4	Severe	Positive	68	M	36/36	Pneumonia, ARDS	Yes	Discharged
5	Severe	Positive	56	M	35/34	ARDS, Pneumonia	Yes	Discharged
6	Severe	Positive	25	M	34/36	B/L Crepts, ARDS, Pneumonia	Yes	Death
9	Severe	Positive	34	M	26/26	Cardiac Fibro-bronchitis(cause of death) , B/L Pneumonia	Yes	Death
10	Severe	Positive	73	M	29/28	GGO, Pneumonia	Yes	Discharged
11	Severe	Positive	43	M	23/22	B/l Crepts, ARDS, B/l GGO	Yes	Discharged
12	Severe	Positive	57	M	36/34	Type-1 respiratory failure Acute respiratory distress syndrome with covid-19 (cause of death)	Yes	Death
13	Severe	Positive	70	M	32/32	B/l crepts, Pneumonia	Yes	Discharged
14	Severe	Positive	57	M	30/28	Pneumonia, B/L crepts	Yes	Discharged
16	Severe	Positive	68	M	22/21	ARDS, Pneumonia, B/l Crepti, Lung infection(cause of death)	Yes	Death
17	Severe	Positive	60	F	18/18	B/l GGO, ARDS, B/l crepts	Yes	ischarged
22	Severe	Positive	55	M	28/30	B/l crepti, ARDS(cause of death)	yes	Death
31	Severe	Positive	50	M	N/A	ARDS(cause of death) Pneumonia, B/l GGO	Yes	Death
43	Severe	Positive	63	M	30/30	B/l GGO, ARDS(cause of death) B/l crepts, B/l Pneumonia	Yes	Death
45	Severe	Positive	70	F	Antigen test	ARDS(cause of death)	Yes	Death
46	Severe	Positive	58	M	N/A	B/l Crepts, Pneumonia	Yes	Discharged
49	Severe	Positive	50	M	30/29	Pneumona, B/L crepts	Yes	Discharged
51	Severe	Positive	58	M	26/25	B/l Pneumonia, ARDS (cause of death)	Yes	Dead
54	Severe	Positive	40	M	32/31	ARDS	Yes	Discharged
62	Severe	Positive	57	M	32/33	ARDS B/l Pneumonia	Yes	Discharged
106	Severe	Positive	70	F	Antigen test	B/L Pneumonia	Yes	Discharged
73	Severe	Positive	39	M	22/21	B/l Pneumonia, ARDS (cause of death)	Yes	Death
78	Severe	Positive	53	F	25/25	Yes,ARI	Yes	Discharged
79	Severe	Positive	58	F	20/22	B/L Pneumonia, ARDS	Yes	Discharged
87	Severe	Positive	72	F	22/22	Yes, Acute Respiratory Distress Syndrome (cause of death)	Yes	Dead
98	Severe	Positive	67	M	16/18	B/l Pneumonia	Yes	Discharged
103	Severe	Positive	90	M	N/A	Yes, Acute Respiratory Distress Syndrome (cause of death)	Yes	Dead
120	Severe	Positive	36	M	Antigen test	Yes, ARI	Yes	Discharged
121	Severe	Positive	70	M	26/22	IL-6 high	Yes	Discharged
124	Severe	Positive	30	M	34/34	IL-6 high, ARDS, B/l Pneumonia	Yes	Discharged
145	Severe	Positive	32	F	23/32/40	Yes, ARI	Yes	Discharged
146	Severe	Positive	56	M	30/35	Yes, Acute Respiratory Distress Syndrome (cause of death)	Yes	Dead
2	Non-Severe	Positive	61	M	27/26	No	No	discharged
26	Non-Severe	Positive	60	F	33/33	No	No	discharged
28	Non-Severe	Positive	53	M	N/A	No	No	Discharged
30	Non-severe	Positive	68	M	N/A	No	No	Discharged
48	Non-Severe	Positive	57	M	34/32	No	No	Discharged
77	Non-Severe	Positive	56	M	N/A	No	No	Discharged
81	Non-severe	Positive	59	F	Antigen test	No	No	Discharged
85	Non-Severe	Positive	53	F	N/A	No	No	Discharged
86	Non-severe	Positive	74	M	24/24	Pneumonia mild	No	Discharged
88	Non-Severe	Positive	57	M	37/37	No	No	Discharged
93	Non-Severe	Positive	60	F	17/18	No	No	Discharged
96	Non-Severe	Positive	50	M	N/A	No	Yes	Discharged
99	Non-Severe	Positive	54	F	24/24	No	No	Discharged
101	Non-Severe	Positive	59	F	Antigen test	No	No	Discharged
104	Non-Severe	Positive	61	M	28/28	No	No	Discharged
113	Non-Severe	Positive	56	M	33/33	No	No	Discharged
114	Non-Severe	Positive	60	M	34/34	No	No	Transferred
115	Non-Severe	Positive	74	F	N/A	No	No	Discharged
MRM validation
17	Severe	Positive	60	F	18/18	B/l GGO, ARDS, B/l crepts	Yes	Discharged
26	Non-Severe	Positive	60	F	33/33	No	No	discharged
31	Severe	Positive	50	M	N/A	ARDS(cause of death) Pneumonia, B/l GGO	Yes	Death
46	Severe	Positive	58	M	N/A	Pneumonia, B/L crepts	Yes	Discharged
48	Non-Severe	Positive	57	M	34/32	No	No	Discharged
54	Severe	Positive	40	M	32/31	ARDS	Yes	Discharged
93	Non-Severe	Positive	60	F	17/18	No	No	Discharged
110	Non-Severe	Positive	54	M	39/39	No	No	Discharged
113	Non-Severe	Positive	56	M	33/33	No	No	Discharged
114	Non-Severe	Positive	60	M	34/34	No	No	Transferred
121	Severe	Positive	70	M	26/22	IL-6 high	Yes	Discharged
146	Severe	Positive	56	M	30/35	ARDS, Pneumonia	Yes	Dead
