# Supplementary material for: Proteomics and Machine Learning Approaches Reveal a Set of Prognostic Markers for COVID-19 Severity With Drug Repurposing Potential
Source: Front Physiol. 2021 Apr 27;12:652799. doi: 10.3389/fphys.2021.652799 (PMC8120435; doi:10.3389/fphys.2021.652799)
Supplement: Supplementary Table 5 — Consolidated sheet of machine learning output file. [file Table_5.xlsx]

## Sheet: 38_DEPs_Model_Comparsion
Sl.No.	Category	Logistic Regression	SVM	Naive Bayes	Random Forest	kNN	Logistic Regression (Non-Severe)	Logistic Regression (Severe)	SVM (Non-Severe)	SVM (Severe)	Naive Bayes (Non-Severe)	Naive Bayes (Severe)	Random Forest (Non-Severe)	Random Forest (Severe)	kNN (Non-Severe)	kNN (Severe)	SERPINA4	APCS	S100A8	FGG	SERPINA6	SERPINA3	SERPINA7	LCP1	SERPINF1	SERPIND1	AGT	A2M	SERPING1	CA1	C4B	APOB	BCHE	AZGP1	IGKV2-30	GPX3	CFD	CD14	C8A	LPA	APOM	CFI	ECM1	IGFBP3	CD44	IGFBP2	SPTBN1	LILRA3	CFP
1	Non-Severe	Non-Severe	Non-Severe	Non-Severe	Non-Severe	Non-Severe	0.949006	0.0509942	0.895084	0.104916	1	8.71761e-13	0.9	0.1	0.8	0.2	17.8474	20.2692	20.7703	27.6967	22.8817	24.836	21.3961	18.5183	23.8709	24.8701	26.2503	29.3095	27.8769	24.3065	24.0405	29.3208	20.8126	25.2751	20.4358	23.1416	26.5456	25.9749	28.3345	23.4516	27.5611	29.902	27.2244	25.2664	24.5584	24.161	21.8995	21.438	27.6771
2	Non-Severe	Non-Severe	Non-Severe	Non-Severe	Non-Severe	Non-Severe	0.99987	0.000129932	0.985024	0.0149761	1	2.6631e-10	0.8	0.2	0.8	0.2	18.5393	18.0972	22.6081	28.0053	22.4822	25.6924	21.195	18.3402	24.4016	25.1905	26.2895	28.0897	29.0104	22.5817	24.6884	29.3033	21.0253	24.9992	18.3476	21.7547	27.2933	25.2421	28.2116	25.2881	27.5326	29.4326	28.0095	25.2877	24.9872	23.2604	19.7306	22.2346	26.8743
3	Severe	Severe	Severe	Severe	Severe	Severe	0.000192608	0.999807	0.00363256	0.996367	7.42051e-16	1	0	1	0	1	26.7477	26.0674	27.792	30.8391	27.1761	31.4416	25.5869	25.9129	28.1361	28.4473	29.582	32.2427	30.0619	28.9592	28.3841	31.334	23.171	28.4309	20.3956	24.4561	24.3117	21.5792	25.998	26.6562	24.0374	28.2339	24.7216	19.1472	22.1847	22.8156	18.9568	19.4786	24.3821
4	Severe	Severe	Severe	Severe	Severe	Severe	7.23062e-05	0.999928	0.00472567	0.995274	7.02605e-15	1	0.1	0.9	0	1	24.3411	28.2909	27.2418	32.067	27.5101	31.6277	26.5992	24.9042	27.6414	27.5522	29.9535	31.9098	30.8236	30.1939	27.1506	31.5167	24.363	27.5256	20.4884	25.0742	22.4699	23.4522	26.8405	22.9493	24.4198	28.303	25.0254	19.0401	21.1712	19.8681	20.4093	22.4155	23.7089
5	Severe	Non-Severe	Severe	Severe	Severe	Severe	0.865999	0.134001	0.0648313	0.935169	1.94096e-14	1	0.025	0.975	0	1	26.4693	25.7663	26.8192	31.0177	27.0339	31.5775	25.8486	23.0333	27.4782	28.4739	29.9908	30.841	30.5903	28.6795	24.1902	31.8264	22.4115	28.216	20.2957	25.3181	22.2752	21.2404	25.8719	22.6527	25.8916	27.5203	23.1619	22.4352	22.0225	21.0625	20.9048	21.1207	25.0529
6	Severe	Severe	Severe	Severe	Severe	Severe	8.02878e-05	0.99992	0.00930089	0.990699	7.20777e-12	1	0.0333333	0.966667	0	1	22.8589	26.9369	24.7316	31.1218	25.9872	30.5422	26.3437	22.689	28.2295	27.5055	28.1164	30.8553	30.0307	26.7035	28.3481	30.0451	21.7161	26.6991	22.2276	24.4711	23.3484	24.7267	28.0347	24.6086	24.5971	28.421	25.5722	17.07	21.6399	20.6722	17.2085	19.1189	24.8912
7	Non-Severe	Non-Severe	Non-Severe	Non-Severe	Severe	Non-Severe	0.79015	0.20985	0.565631	0.434369	1	3.09008e-08	0.366667	0.633333	0.6	0.4	17.6057	18.6859	23.0468	27.8566	22.2454	26.7196	23.6096	18.7989	23.4704	24.8853	28.0605	30.9625	28.7994	24.065	25.8608	29.2051	21.6402	26.1093	19.6871	23.8124	24.8442	24.4686	28.4553	25.4657	26.7192	29.8754	26.2041	23.579	23.547	24.3037	22.5344	22.1811	26.7505
8	Non-Severe	Non-Severe	Severe	Severe	Severe	Severe	0.732922	0.267078	0.164784	0.835216	7.17014e-06	0.999993	0.275	0.725	0.2	0.8	23.0835	18.567	24.0034	29.8769	25.5629	28.8285	22.7828	19.8093	24.792	27.6632	29.6188	29.2821	30.8604	25.9057	25.5467	30.6263	23.9971	26.0135	21.0242	24.3793	24.6504	23.5536	26.3069	24.6527	27.0011	29.0907	25.9788	23.5041	23.5081	22.7643	22.4137	20.217	26.5453
9	Severe	Non-Severe	Non-Severe	Non-Severe	Non-Severe	Non-Severe	0.553318	0.446682	0.682935	0.317065	1	1.98772e-11	0.666667	0.333333	0.6	0.4	17.091	20.5963	25.6182	28.7814	22.2622	26.8671	23.0374	20.1089	24.6694	24.2057	26.4474	28.9805	28.8789	25.0171	23.6703	28.7287	18.568	24.9034	17.6165	23.9193	24.6528	25.2943	28.148	26.9882	26.3087	30.1859	27.3144	24.3239	24.9128	22.8111	20.7909	21.0622	26.2454
10	Severe	Severe	Severe	Non-Severe	Non-Severe	Severe	0.354473	0.645527	0.300273	0.699727	0.9999	9.96864e-05	0.5	0.5	0.4	0.6	17.2419	15.8694	31.3236	28.1937	23.2527	28.399	22.4638	24.5026	25.8268	24.6594	28.3317	30.6755	29.2672	25.7839	24.8342	29.0512	21.4233	27.0348	22.3213	23.2545	24.7423	24.8742	28.4662	23.9477	27.3633	29.706	26.6882	22.9025	24.5114	24.1089	19.0215	22.3136	26.3422
11	Severe	Severe	Severe	Severe	Severe	Severe	0.00025429	0.999746	0.0111413	0.988859	4.20342e-17	1	0.0666667	0.933333	0	1	24.9284	25.707	26.9232	31.9875	26.9331	31.8637	26.7813	23.1073	27.7995	27.3849	29.9856	30.6281	30.522	25.3593	28.3695	32.0672	22.3391	28.168	22.2179	24.1584	24.1161	23.2435	26.582	21.8303	25.2278	28.2029	24.6265	22.8933	22.1193	22.8397	17.6837	18.3926	23.3314
12	Non-Severe	Non-Severe	Non-Severe	Non-Severe	Non-Severe	Non-Severe	0.885646	0.114354	0.781079	0.218921	1	8.9843e-11	0.566667	0.433333	0.6	0.4	19.9908	18.7774	22.0384	27.9041	22.2807	25.9524	22.8039	16.7494	23.9168	25.2434	26.6664	28.3919	28.5107	24.1208	23.6471	29.268	18.6926	25.7143	20.2016	24.3418	25.7649	25.5182	28.5312	28.6224	27.4932	29.9777	26.8938	24.7966	24.0825	24.2356	22.2896	20.4554	26.9191
13	Non-Severe	Non-Severe	Non-Severe	Non-Severe	Non-Severe	Non-Severe	0.970879	0.0291208	0.905155	0.0948446	1	2.96629e-10	0.65	0.35	0.8	0.2	15.4824	19.879	21.2883	27.7416	22.7412	26.5119	23.1912	20.2815	24.2119	25.6246	26.9532	30.1372	29.3406	23.5891	24.4328	29.1007	20.5496	25.55	19.5836	23.6858	25.7675	25.1462	28.2448	30.2426	27.3295	29.7454	27.5819	25.2295	23.8849	22.2761	21.9308	21.7942	26.5439
14	Severe	Severe	Severe	Severe	Severe	Severe	4.58526e-05	0.999954	0.00431864	0.995681	6.97297e-18	1	0	1	0	1	26.4271	26.7053	27.0601	30.6368	27.1164	31.3337	25.8919	26.1427	28.0961	29.5897	29.0296	30.4998	30.3543	27.3704	27.4015	31.8046	24.3202	28.4407	24.2406	25.7209	22.2295	22.6998	26.3548	16.6351	25.3266	28.3564	23.4435	23.2894	21.4984	20.2375	20.3192	19.9697	24.5298
15	Severe	Severe	Severe	Severe	Severe	Severe	0.021526	0.978474	0.050442	0.949558	7.39001e-15	1	0.0333333	0.966667	0	1	25.2819	26.517	23.7175	31.7238	26.7918	32.1007	25.9228	22.155	27.4734	28.5354	29.0078	31.8824	30.5388	25.2599	27.2687	31.5626	23.2747	27.7785	18.622	25.4859	22.9166	23.0124	26.0577	23.1744	25.3865	28.3824	24.7815	17.9799	21.6805	20.8375	19.2935	22.2693	24.6633
16	Severe	Severe	Severe	Severe	Severe	Severe	0.000292618	0.999707	0.0602075	0.939793	2.87747e-08	1	0	1	0	1	27.7186	22.4691	23.1537	28.0734	27.1328	28.4506	25.9016	25.2977	27.4148	27.8893	28.7962	29.8678	30.0387	25.0861	27.3879	32.4207	24.5729	28.5565	20.7511	24.6037	24.9812	23.7776	27.021	25.2407	25.8378	27.9935	26.2864	23.7327	24.1031	22.1945	21.296	16.5913	25.59
17	Non-Severe	Non-Severe	Non-Severe	Non-Severe	Severe	Non-Severe	0.928626	0.0713742	0.706668	0.293332	0.999999	5.60792e-07	0.4	0.6	0.6	0.4	20.9963	20.272	25.3757	27.4435	24.1219	28.5992	17.0545	22.3081	27.4218	23.0833	28.151	28.7296	28.0317	23.8779	25.9638	29.1312	20.5365	27.2435	20.2658	20.5654	27.075	25.0513	28.2916	24.4492	26.1719	29.5126	27.5828	24.3972	24.5862	23.8144	18.8806	22.812	26.687
18	Non-Severe	Non-Severe	Non-Severe	Non-Severe	Non-Severe	Non-Severe	0.952542	0.0474581	0.761765	0.238235	0.999985	1.48182e-05	0.8	0.2	0.6	0.4	17.9843	16.426	22.8132	27.5491	24.3573	28.7413	24.1865	20.8976	27.3051	24.7348	27.7262	30.732	28.6292	24.9762	24.9563	29.4934	20.9253	26.0429	20.1966	23.7758	25.3896	24.8072	27.955	25.0521	26.5308	29.2203	26.8916	22.1745	24.1759	21.8279	22.3372	21.0449	25.9651
19	Severe	Severe	Severe	Severe	Severe	Severe	0.0317043	0.968296	0.106438	0.893562	1.05487e-08	1	0.166667	0.833333	0.2	0.8	24.0764	26.2611	22.8923	30.6924	27.1469	30.4911	24.5434	25.5812	27.4815	28.0197	29.1854	32.0874	30.1891	26.5048	27.6362	32.7058	21.852	27.8139	25.6929	23.9169	22.6658	23.3538	26.2484	25.772	25.6195	28.2829	25.0037	21.3126	22.1478	22.3683	20.3579	20.4641	23.179
20	Severe	Severe	Severe	Severe	Severe	Severe	0.00178125	0.998219	0.055151	0.944849	1.84375e-12	1	0.0916667	0.908333	0.2	0.8	22.4263	28.7163	24.1957	31.3836	26.9006	31.3194	27.2068	23.6529	27.8018	28.1246	28.5865	31.336	29.4864	23.7922	28.8733	31.3927	22.563	26.5614	24.0532	25.5765	21.6293	24.3598	26.3734	25.3564	24.8105	27.9446	24.9747	23.3692	21.0412	18.4147	20.1913	20.5971	23.1882
21	Severe	Severe	Severe	Severe	Severe	Severe	0.0779144	0.922086	0.262739	0.737261	1.50252e-08	1	0.166667	0.833333	0.2	0.8	24.826	26.9632	24.5934	32.2736	26.7264	30.3488	24.9798	24.4834	27.4674	27.7093	28.0956	30.6207	28.7299	25.7871	24.0967	32.1291	22.6627	26.2565	24.6034	22.7757	23.6172	23.4242	27.1419	24.6581	24.8411	27.2426	25.0516	23.0165	22.029	22.486	21.7083	19.6451	23.9257
22	Non-Severe	Non-Severe	Non-Severe	Non-Severe	Severe	Non-Severe	0.978888	0.0211119	0.698721	0.301279	1	1.72641e-10	0.466667	0.533333	0.6	0.4	20.2376	20.617	22.9081	27.4559	19.2336	27.4532	21.8604	20.5929	24.1369	24.6842	26.8379	28.7363	28.1537	24.3094	22.0485	29.1242	20.6639	26.0051	21.8387	23.0756	26.4561	23.7713	28.3331	26.1152	27.0245	30.4589	26.6787	21.3011	24.4879	22.3922	23.9913	22.5556	25.6982
23	Non-Severe	Non-Severe	Non-Severe	Non-Severe	Non-Severe	Non-Severe	0.998662	0.00133778	0.945569	0.0544306	1	2.1538e-12	0.9	0.1	0.8	0.2	18.9055	20.104	21.5412	28.6674	22.4615	27.4972	20.9755	18.5878	24.9721	23.4641	25.8083	27.9837	27.4077	24.2744	24.8562	29.381	21.2419	24.6582	18.8953	23.1859	24.8997	25.892	28.1458	22.7033	27.6186	30.3872	28.0835	24.8259	26.2862	23.2088	22.6188	24.1381	27.5312
24	Severe	Severe	Severe	Severe	Severe	Severe	0.00547187	0.994528	0.0713206	0.928679	6.51018e-07	0.999999	0.1	0.9	0.2	0.8	24.169	23.3668	28.3492	28.904	25.2116	29.393	24.4216	22.3196	26.8049	26.363	28.8	30.8019	30.7235	24.6755	25.7835	31.6157	22.0974	28	22.4121	23.8409	24.6881	25.1466	28.0607	28.4052	26.9941	29.1347	25.2464	22.9707	23.1676	24.5282	22.7811	19.991	25.3451
25	Severe	Severe	Severe	Severe	Severe	Severe	0.02652	0.97348	0.0132887	0.986711	1.4003e-13	1	0.175	0.825	0.2	0.8	23.7312	21.8426	26.1475	30.9974	26.7484	33.1732	25.0842	21.8997	27.1853	27.4341	29.6084	31.8023	29.8975	26.8655	26.2592	31.8677	25.6081	28.2703	28.9704	24.793	19.7335	20.8375	25.6896	19.423	25.0195	27.899	23.9707	21.7176	21.5416	21.5109	23.6259	21.7149	20.5161
26	Severe	Severe	Severe	Severe	Severe	Severe	4.20269e-06	0.999996	0.0048458	0.995154	4.69835e-10	1	0.125	0.875	0	1	21.2303	23.5884	25.0483	32.8069	24.3198	31.0659	22.7086	23.7314	26.5785	24.4948	28.3658	31.7155	28.8546	27.3506	24.1575	30.6888	19.4037	27.9902	19.6647	23.6636	24.3045	23.0382	26.5822	18.7066	24.7624	27.7023	24.3596	22.5697	21.7738	20.2673	19.8566	15.9481	22.9384
27	Non-Severe	Severe	Non-Severe	Severe	Severe	Severe	0.000918027	0.999082	0.389262	0.610738	0.00232032	0.99768	0.48	0.52	0	1	25.2277	25.9266	25.3595	28.561	24.6743	27.8113	22.4204	24.3709	26.502	23.3448	25.9238	31.1699	27.288	25.7822	21.6628	29.2046	25.2369	25.0274	25.9425	19.5144	24.2062	23.9015	24.7323	28.0428	25.4458	28.074	25.5573	22.1891	22.3794	21.5942	26.3073	21.7247	24.4466
28	Non-Severe	Severe	Severe	Severe	Severe	Severe	0.0536539	0.946346	0.127663	0.872337	7.50986e-10	1	0.213095	0.786905	0	1	25.8654	24.3079	21.3729	31.4029	26.419	29.836	25.0279	22.011	27.4381	28.0583	27.6045	31.8736	28.6629	25.5011	28.1461	29.9408	22.8881	25.685	24.7446	23.9983	23.2942	23.7979	26.9436	23.87	25.6161	27.1698	25.1406	23.5372	21.8998	20.7604	22.0922	20.9373	24.0123
29	Severe	Severe	Severe	Non-Severe	Severe	Severe	0.00664778	0.993352	0.227533	0.772467	0.999682	0.000318185	0.33	0.67	0.2	0.8	22.6544	22.8061	30.5166	27.0555	22.5709	26.4916	22.1258	21.3855	24.9355	23.4816	27.1589	28.092	29.8343	27.8582	23.992	29.1786	21.5538	28.5211	22.9729	23.3471	25.3425	23.3853	26.7384	24.7518	26.9583	29.2134	26.4058	24.3985	24.6118	23.431	21.8732	18.798	25.7203
30	Severe	Severe	Non-Severe	Non-Severe	Severe	Severe	0.263678	0.736322	0.39561	0.60439	1	5.76155e-08	0.3	0.7	0.2	0.8	15.8949	19.9095	26.8488	26.8278	19.5978	26.674	21.8115	21.0573	25.1944	24.4167	27.4805	30.1847	28.6442	26.1963	24.9399	29.2846	20.7183	27.1389	22.2914	24.1695	25.4842	24.6986	27.893	27.3583	27.2918	29.6041	26.9088	22.5101	24.8707	24.2628	21.0507	19.8901	26.5596
31	Severe	Severe	Non-Severe	Non-Severe	Non-Severe	Non-Severe	0.0684502	0.93155	0.512343	0.487657	1	6.15197e-09	0.596429	0.403571	0.6	0.4	17.6031	20.5042	24.9932	28.3641	22.019	25.7148	20.8779	19.7166	23.794	24.634	26.9082	29.19	28.5507	22.5625	25.1837	28.8694	21.4887	26.1206	21.2828	24.7227	23.7803	23.5982	28.0586	22.39	27.1927	29.8635	26.1654	25.0138	23.8283	21.3238	21.9913	21.3422	26.8528
32	Non-Severe	Non-Severe	Non-Severe	Non-Severe	Non-Severe	Non-Severe	0.914711	0.0852891	0.611039	0.388961	1	4.29668e-09	0.766667	0.233333	0.6	0.4	20.3591	19.4581	29.0213	28.4287	21.5217	27.6079	21.9651	21.5016	25.619	22.2789	27.3745	28.7677	27.5941	25.747	17.8871	28.6448	19.7156	25.4458	20.4974	22.3593	24.4208	24.624	27.8296	26.8526	27.0303	30.4123	26.5186	23.9145	24.5975	23.5329	22.3918	21.3808	26.5079
33	Non-Severe	Severe	Non-Severe	Non-Severe	Severe	Severe	0.390475	0.609525	0.526565	0.473435	0.858213	0.141787	0.14	0.86	0.4	0.6	19.5515	21.8538	25.6853	28.9737	25.2677	29.7638	23.2591	17.1146	28.5461	24.4884	28.8487	30.9076	30.0028	26.207	25.3274	30.7067	19.9751	26.4182	18.9716	23.4571	25.8205	25.1437	27.3575	28.2999	26.5312	29.2019	27.1576	23.417	23.4893	23.6538	21.5428	22.4339	25.3743
34	Severe	Severe	Severe	Non-Severe	Severe	Severe	0.107965	0.892035	0.386952	0.613048	1	1.19601e-10	0.36	0.64	0.2	0.8	17.9034	21.2197	29.0539	27.9011	21.7589	26.6594	22.5756	20.1019	24.4603	24.5085	26.6024	28.2397	28.9065	26.4479	24.3221	28.7035	20.9625	27.1504	21.8921	23.6518	25.5938	25.1412	28.7289	26.6037	27.3197	30.0892	27.0742	24.9282	24.1917	23.3876	23.5032	22.2435	27.1244
35	Severe	Severe	Severe	Severe	Severe	Severe	2.27205e-05	0.999977	0.00771439	0.992286	7.3015e-18	1	0	1	0	1	24.3827	25.2695	27.594	31.6196	26.9301	32.4839	26.6195	26.0628	27.5236	25.9967	29.6058	31.3086	30.8922	27.4691	28.5372	31.5644	23.765	27.9568	24.5926	26.81	21.0285	22.5375	26.7214	24.4285	24.6927	27.9695	25.1573	20.2495	22.3626	20.24	18.1437	19.8847	24.5943
36	Severe	Severe	Severe	Severe	Severe	Severe	0.00082163	0.999178	0.0326049	0.967395	1.06172e-14	1	0.02	0.98	0	1	26.7884	22.932	26.0794	30.8416	27.5697	31.8389	26.553	26.1553	28.1078	28.3634	29.8669	30.0764	30.4441	25.9459	27.6146	32.3863	25.2137	28.4258	19.9918	25.8215	23.4741	22.4282	26.3639	18.7633	26.2888	27.9413	25.76	20.6782	22.866	21.2499	18.8041	21.0093	25.0467
37	Non-Severe	Severe	Non-Severe	Non-Severe	Non-Severe	Non-Severe	0.102367	0.897633	0.549588	0.450412	1	1.05094e-11	0.7	0.3	0.6	0.4	15.7508	21.2297	28.7483	28.1361	23.7945	26.7502	22.5208	20.9321	24.7224	24.5905	26.7412	27.821	28.1905	25.6847	23.8393	27.7494	21.6775	26.0313	18.3203	23.6141	25.2935	25.4366	28.6663	25.1689	27.2455	30.0162	26.8991	24.834	24.218	22.5432	22.0971	23.5512	26.9248
38	Non-Severe	Non-Severe	Non-Severe	Non-Severe	Non-Severe	Non-Severe	0.812959	0.187041	0.75955	0.24045	1	2.89075e-10	0.85	0.15	0.6	0.4	20.6043	20.8692	23.3016	27.0597	23.3745	27.945	21.0581	19.8221	26.3748	23.8134	27.5084	28.2053	28.5545	21.0945	26.2162	29.1312	20.5099	25.9309	20.2541	22.0692	25.3206	24.9237	28.4691	22.747	26.4805	29.7813	27.4011	22.673	24.2814	21.0685	21.6888	22.66	26.0039
39	Severe	Severe	Severe	Non-Severe	Severe	Non-Severe	0.0366334	0.963367	0.225213	0.774787	0.999777	0.0002234	0.4	0.6	0.6	0.4	19.568	19.1863	27.129	28.9839	24.0086	29.1189	22.9096	20.7813	26.7833	24.5725	27.8504	28.4795	28.4412	26.7757	24.5605	29.5497	21.682	26.4337	20.9783	24.4691	24.4871	24.1228	28.0945	23.0892	27.0052	29.8542	26.1356	22.4859	23.4117	22.948	22.0324	21.1021	25.6378
40	Severe	Non-Severe	Severe	Non-Severe	Severe	Severe	0.666127	0.333873	0.38764	0.61236	0.999978	2.16297e-05	0.375	0.625	0.4	0.6	19.3083	20.7869	27.6194	27.5856	21.9547	26.7919	17.562	22.4878	23.9922	23.6178	26.8599	28.2205	28.4206	27.7811	23.1386	29.2136	21.0278	27.0209	21.6614	20.8705	24.5296	24.6828	28.2166	29.6464	26.9387	29.8735	26.2688	23.8538	24.5632	25.4625	21.0566	20.7738	25.2257
41	Severe	Severe	Severe	Non-Severe	Non-Severe	Non-Severe	0.27923	0.72077	0.392666	0.607334	0.996793	0.00320655	0.666667	0.333333	0.8	0.2	21.7582	22.4332	24.2859	31.2026	24.216	26.9587	24.3823	18.8371	25.8751	26.0126	26.8236	30.2992	28.7466	25.854	26.0879	30.0711	22.6547	25.7626	19.6634	24.321	25.2626	24.4459	28.2993	25.8042	26.5265	29.8816	26.1459	24.7718	23.4171	20.0967	23.2515	19.6973	26.7439
42	Non-Severe	Non-Severe	Non-Severe	Non-Severe	Non-Severe	Non-Severe	0.97827	0.0217304	0.854236	0.145764	1	2.36472e-13	0.72	0.28	0.6	0.4	20.1718	21.0484	26.2436	27.7227	21.5925	25.2358	22.67	21.6186	24.2007	24.8422	26.2853	30.383	28.0906	24.913	18.3728	28.3551	20.3903	24.6024	20.6755	21.3982	26.1126	23.7636	27.625	29.3004	27.9595	29.8054	27.405	24.9004	24.5866	24.6326	22.0693	20.8421	27.0729
43	Severe	Non-Severe	Non-Severe	Non-Severe	Non-Severe	Non-Severe	0.970837	0.029163	0.850776	0.149224	1	1.9665e-13	0.85	0.15	0.8	0.2	15.6522	20.418	22.8969	27.4281	20.9936	25.3329	23.8375	19.6742	23.4496	23.403	26.986	28.7635	27.1761	25.2665	23.6427	29.6508	20.4287	26.8118	18.6728	23.583	25.7167	26.5317	28.666	22.7166	26.6683	29.9268	27.2259	24.2701	25.1007	23.5001	22.2142	20.6525	26.7401
44	Severe	Severe	Severe	Severe	Severe	Severe	0.00415061	0.995849	0.0771603	0.92284	1.95138e-06	0.999998	0.133333	0.866667	0.2	0.8	23.2594	20.0833	26.3564	29.3421	23.5379	28.0645	22.881	23.1629	26.0469	25.7659	28.7095	30.5403	29.8593	25.9403	25.14	30.5715	21.4765	26.8775	20.8248	25.4386	23.3141	23.2174	26.7129	18.8399	26.9063	28.881	26.369	23.4463	24.0203	23.0959	19.4407	20.3038	25.8787
45	Severe	Non-Severe	Severe	Severe	Severe	Severe	0.610372	0.389628	0.182693	0.817307	1.75254e-07	1	0.38	0.62	0.2	0.8	18.55	25.5372	21.4726	31.6697	26.6471	29.962	24.9694	21.0922	26.7283	27.2859	28.0091	32.791	30.5115	25.4493	27.0209	30.0556	22.4064	25.4826	25.2392	23.806	23.405	22.5683	25.8917	28.5121	24.7894	27.5811	23.7786	19.9401	22.0108	21.0895	20.7433	20.0961	23.7813
46	Severe	Severe	Severe	Non-Severe	Severe	Non-Severe	0.397168	0.602832	0.425448	0.574552	1	9.07277e-08	0.333333	0.666667	0.6	0.4	19.6816	20.4488	24.6585	30.3603	22.6374	27.4732	22.1064	19.8072	25.3722	25.4161	26.8336	29.1125	28.5496	23.9536	24.1204	29.7809	21.3927	26.6741	20.8922	24.6342	24.1883	23.811	28.3619	22.2622	26.6819	29.9452	26.4162	23.7632	23.5665	21.2474	22.0223	22.0215	26.0839
47	Non-Severe	Non-Severe	Non-Severe	Non-Severe	Non-Severe	Non-Severe	0.864723	0.135277	0.759194	0.240806	1	1.02368e-10	0.741667	0.258333	0.6	0.4	18.968	16.9211	23.6289	28.6497	23.4801	27.933	23.5062	21.7036	26.1698	24.9489	26.7653	28.4677	28.0287	24.9576	23.0283	29.5999	21.4398	24.647	19.787	22.3154	24.81	24.5277	28.0586	25.1825	27.5891	29.6524	27.9313	25.7027	25.0706	22.9051	22.2866	19.1568	26.3713
48	Severe	Severe	Severe	Severe	Severe	Severe	0.000835286	0.999165	0.127708	0.872292	0.000245377	0.999755	0.3	0.7	0	1	25.0053	23.5153	28.7331	28.678	24.9159	28.2451	24.9024	22.8065	26.948	27.0019	29.7261	30.7274	30.3618	26.1562	28.3493	30.7232	23.3635	27.3465	20.5669	22.8238	26.6223	24.7994	28.0954	22.9668	25.7025	29.6592	26.0923	21.5754	23.9649	23.2871	24.2623	19.6522	25.4355
49	Severe	Severe	Severe	Severe	Severe	Severe	2.79142e-05	0.999972	0.0104534	0.989547	5.5045e-17	1	0	1	0	1	26.5693	26.8259	25.7704	31.3926	27.5229	30.1512	25.667	23.6502	27.7433	28.3849	29.5067	30.3044	29.9939	28.6606	27.0338	32.4838	23.9044	26.7984	20.8344	25.057	22.6283	22.9817	26.9058	20.2241	25.204	27.8984	25.6551	22.395	21.7975	19.3913	22.3832	18.8932	24.1496
50	Severe	Severe	Severe	Severe	Severe	Severe	0.0268753	0.973125	0.0963991	0.903601	2.23493e-14	1	0	1	0	1	25.182	26.8502	23.3112	30.8548	27.9355	30.7521	27.7276	25.5293	28.5045	27.4865	28.9977	30.8569	30.377	26.823	28.3189	32.3863	24.3651	27.4872	23.1094	24.8743	24.3803	25.3981	26.8263	19.8333	24.5026	28.7361	26.2763	22.7724	23.5626	21.5572	20.0599	24.0744	25.7331
51	Severe	Severe	Severe	Severe	Severe	Severe	0.00551484	0.994485	0.0746416	0.925358	6.78366e-09	1	0.2	0.8	0.2	0.8	22.1577	24.4163	23.6715	32.7681	25.6821	30.9262	25.9379	22.7299	27.3283	25.8301	28.0277	31.8709	28.9118	23.4095	25.3276	30.7091	22.0463	26.8873	21.5899	24.0721	23.9786	23.635	26.9276	25.3994	24.9797	28.4451	25.2856	20.1254	19.8882	21.6617	18.4733	20.3389	23.8323
[truncated: 5 more columns]

## Sheet: 38_DEPs_SVM_Model
Sl.No.	Category	SVM	SVM (Non-Severe)	SVM (Severe)	SERPINA4	APCS	S100A8	FGG	SERPINA6	SERPINA3	SERPINA7	LCP1	SERPINF1	SERPIND1	AGT	A2M	SERPING1	CA1	C4B	APOB	BCHE	AZGP1	IGKV2-30	GPX3	CFD	CD14	C8A	LPA	APOM	CFI	ECM1	IGFBP3	CD44	IGFBP2	SPTBN1	LILRA3	CFP	FBLN1	APOA2	TPM4	SEMG2	PI16
1	Non-Severe	Non-Severe	0.876878	0.123122	17.8474	20.2692	20.7703	27.6967	22.8817	24.836	21.3961	18.5183	23.8709	24.8701	26.2503	29.3095	27.8769	24.3065	24.0405	29.3208	20.8126	25.2751	20.4358	23.1416	26.5456	25.9749	28.3345	23.4516	27.5611	29.902	27.2244	25.2664	24.5584	24.161	21.8995	21.438	27.6771	26.8711	30.6809	26.3063	20.4997	22.4145
2	Non-Severe	Non-Severe	0.978637	0.021363	18.5393	18.0972	22.6081	28.0053	22.4822	25.6924	21.195	18.3402	24.4016	25.1905	26.2895	28.0897	29.0104	22.5817	24.6884	29.3033	21.0253	24.9992	18.3476	21.7547	27.2933	25.2421	28.2116	25.2881	27.5326	29.4326	28.0095	25.2877	24.9872	23.2604	19.7306	22.2346	26.8743	25.5637	30.6595	27.4246	23.65	24.0919
3	Severe	Severe	0.00587125	0.994129	26.7477	26.0674	27.792	30.8391	27.1761	31.4416	25.5869	25.9129	28.1361	28.4473	29.582	32.2427	30.0619	28.9592	28.3841	31.334	23.171	28.4309	20.3956	24.4561	24.3117	21.5792	25.998	26.6562	24.0374	28.2339	24.7216	19.1472	22.1847	22.8156	18.9568	19.4786	24.3821	24.1554	27.9123	22.7536	15.9057	18.2269
4	Severe	Severe	0.00746368	0.992536	24.3411	28.2909	27.2418	32.067	27.5101	31.6277	26.5992	24.9042	27.6414	27.5522	29.9535	31.9098	30.8236	30.1939	27.1506	31.5167	24.363	27.5256	20.4884	25.0742	22.4699	23.4522	26.8405	22.9493	24.4198	28.303	25.0254	19.0401	21.1712	19.8681	20.4093	22.4155	23.7089	24.761	28.2035	23.9252	15.7209	19.5693
5	Severe	Severe	0.0802797	0.91972	26.4693	25.7663	26.8192	31.0177	27.0339	31.5775	25.8486	23.0333	27.4782	28.4739	29.9908	30.841	30.5903	28.6795	24.1902	31.8264	22.4115	28.216	20.2957	25.3181	22.2752	21.2404	25.8719	22.6527	25.8916	27.5203	23.1619	22.4352	22.0225	21.0625	20.9048	21.1207	25.0529	24.6825	27.4503	22.9407	28.8188	20.6175
6	Severe	Severe	0.0138323	0.986168	22.8589	26.9369	24.7316	31.1218	25.9872	30.5422	26.3437	22.689	28.2295	27.5055	28.1164	30.8553	30.0307	26.7035	28.3481	30.0451	21.7161	26.6991	22.2276	24.4711	23.3484	24.7267	28.0347	24.6086	24.5971	28.421	25.5722	17.07	21.6399	20.6722	17.2085	19.1189	24.8912	24.3496	29.4883	24.1098	14.2981	19.845
7	Non-Severe	Non-Severe	0.562476	0.437524	17.6057	18.6859	23.0468	27.8566	22.2454	26.7196	23.6096	18.7989	23.4704	24.8853	28.0605	30.9625	28.7994	24.065	25.8608	29.2051	21.6402	26.1093	19.6871	23.8124	24.8442	24.4686	28.4553	25.4657	26.7192	29.8754	26.2041	23.579	23.547	24.3037	22.5344	22.1811	26.7505	26.1079	30.8721	26.6446	18.5324	20.8533
8	Non-Severe	Severe	0.16775	0.83225	23.0835	18.567	24.0034	29.8769	25.5629	28.8285	22.7828	19.8093	24.792	27.6632	29.6188	29.2821	30.8604	25.9057	25.5467	30.6263	23.9971	26.0135	21.0242	24.3793	24.6504	23.5536	26.3069	24.6527	27.0011	29.0907	25.9788	23.5041	23.5081	22.7643	22.4137	20.217	26.5453	22.9427	29.1238	24.4921	20.7455	20.0793
9	Severe	Non-Severe	0.678142	0.321858	17.091	20.5963	25.6182	28.7814	22.2622	26.8671	23.0374	20.1089	24.6694	24.2057	26.4474	28.9805	28.8789	25.0171	23.6703	28.7287	18.568	24.9034	17.6165	23.9193	24.6528	25.2943	28.148	26.9882	26.3087	30.1859	27.3144	24.3239	24.9128	22.8111	20.7909	21.0622	26.2454	25.3899	29.5333	26.9781	16.486	22.3681
10	Severe	Severe	0.301799	0.698201	17.2419	15.8694	31.3236	28.1937	23.2527	28.399	22.4638	24.5026	25.8268	24.6594	28.3317	30.6755	29.2672	25.7839	24.8342	29.0512	21.4233	27.0348	22.3213	23.2545	24.7423	24.8742	28.4662	23.9477	27.3633	29.706	26.6882	22.9025	24.5114	24.1089	19.0215	22.3136	26.3422	25.1212	28.3718	24.3578	15.0737	23.7981
11	Severe	Severe	0.011979	0.988021	24.9284	25.707	26.9232	31.9875	26.9331	31.8637	26.7813	23.1073	27.7995	27.3849	29.9856	30.6281	30.522	25.3593	28.3695	32.0672	22.3391	28.168	22.2179	24.1584	24.1161	23.2435	26.582	21.8303	25.2278	28.2029	24.6265	22.8933	22.1193	22.8397	17.6837	18.3926	23.3314	23.5519	28.8095	23.5598	18.7909	19.5089
12	Non-Severe	Non-Severe	0.77193	0.22807	19.9908	18.7774	22.0384	27.9041	22.2807	25.9524	22.8039	16.7494	23.9168	25.2434	26.6664	28.3919	28.5107	24.1208	23.6471	29.268	18.6926	25.7143	20.2016	24.3418	25.7649	25.5182	28.5312	28.6224	27.4932	29.9777	26.8938	24.7966	24.0825	24.2356	22.2896	20.4554	26.9191	27.1144	31.824	27.1109	16.1965	22.8213
13	Non-Severe	Non-Severe	0.896803	0.103197	15.4824	19.879	21.2883	27.7416	22.7412	26.5119	23.1912	20.2815	24.2119	25.6246	26.9532	30.1372	29.3406	23.5891	24.4328	29.1007	20.5496	25.55	19.5836	23.6858	25.7675	25.1462	28.2448	30.2426	27.3295	29.7454	27.5819	25.2295	23.8849	22.2761	21.9308	21.7942	26.5439	26.4136	31.8904	27.1141	20.6472	22.4014
14	Severe	Severe	0.00541101	0.994589	26.4271	26.7053	27.0601	30.6368	27.1164	31.3337	25.8919	26.1427	28.0961	29.5897	29.0296	30.4998	30.3543	27.3704	27.4015	31.8046	24.3202	28.4407	24.2406	25.7209	22.2295	22.6998	26.3548	16.6351	25.3266	28.3564	23.4435	23.2894	21.4984	20.2375	20.3192	19.9697	24.5298	22.0558	27.8546	17.8314	19.8965	19.863
15	Severe	Severe	0.0566239	0.943376	25.2819	26.517	23.7175	31.7238	26.7918	32.1007	25.9228	22.155	27.4734	28.5354	29.0078	31.8824	30.5388	25.2599	27.2687	31.5626	23.2747	27.7785	18.622	25.4859	22.9166	23.0124	26.0577	23.1744	25.3865	28.3824	24.7815	17.9799	21.6805	20.8375	19.2935	22.2693	24.6633	23.2443	28.8989	20.459	18.9823	17.5588
16	Severe	Severe	0.0670133	0.932987	27.7186	22.4691	23.1537	28.0734	27.1328	28.4506	25.9016	25.2977	27.4148	27.8893	28.7962	29.8678	30.0387	25.0861	27.3879	32.4207	24.5729	28.5565	20.7511	24.6037	24.9812	23.7776	27.021	25.2407	25.8378	27.9935	26.2864	23.7327	24.1031	22.1945	21.296	16.5913	25.59	24.4785	28.3614	26.3689	14.7007	18.8382
17	Non-Severe	Non-Severe	0.738585	0.261415	20.9963	20.272	25.3757	27.4435	24.1219	28.5992	17.0545	22.3081	27.4218	23.0833	28.151	28.7296	28.0317	23.8779	25.9638	29.1312	20.5365	27.2435	20.2658	20.5654	27.075	25.0513	28.2916	24.4492	26.1719	29.5126	27.5828	24.3972	24.5862	23.8144	18.8806	22.812	26.687	25.0465	29.3219	27.2579	21.5721	21.818
18	Non-Severe	Non-Severe	0.792	0.208	17.9843	16.426	22.8132	27.5491	24.3573	28.7413	24.1865	20.8976	27.3051	24.7348	27.7262	30.732	28.6292	24.9762	24.9563	29.4934	20.9253	26.0429	20.1966	23.7758	25.3896	24.8072	27.955	25.0521	26.5308	29.2203	26.8916	22.1745	24.1759	21.8279	22.3372	21.0449	25.9651	26.1469	31.4263	26.6153	19.6489	22.2232
19	Severe	Severe	0.106177	0.893823	24.0764	26.2611	22.8923	30.6924	27.1469	30.4911	24.5434	25.5812	27.4815	28.0197	29.1854	32.0874	30.1891	26.5048	27.6362	32.7058	21.852	27.8139	25.6929	23.9169	22.6658	23.3538	26.2484	25.772	25.6195	28.2829	25.0037	21.3126	22.1478	22.3683	20.3579	20.4641	23.179	25.1963	30.0678	27.0694	20.5504	19.3374
20	Severe	Severe	0.0530443	0.946956	22.4263	28.7163	24.1957	31.3836	26.9006	31.3194	27.2068	23.6529	27.8018	28.1246	28.5865	31.336	29.4864	23.7922	28.8733	31.3927	22.563	26.5614	24.0532	25.5765	21.6293	24.3598	26.3734	25.3564	24.8105	27.9446	24.9747	23.3692	21.0412	18.4147	20.1913	20.5971	23.1882	23.5731	29.1936	26.1091	19.567	17.0822
21	Severe	Severe	0.273788	0.726212	24.826	26.9632	24.5934	32.2736	26.7264	30.3488	24.9798	24.4834	27.4674	27.7093	28.0956	30.6207	28.7299	25.7871	24.0967	32.1291	22.6627	26.2565	24.6034	22.7757	23.6172	23.4242	27.1419	24.6581	24.8411	27.2426	25.0516	23.0165	22.029	22.486	21.7083	19.6451	23.9257	23.9472	30.7097	23.9307	21.5355	18.3345
22	Non-Severe	Non-Severe	0.712782	0.287218	20.2376	20.617	22.9081	27.4559	19.2336	27.4532	21.8604	20.5929	24.1369	24.6842	26.8379	28.7363	28.1537	24.3094	22.0485	29.1242	20.6639	26.0051	21.8387	23.0756	26.4561	23.7713	28.3331	26.1152	27.0245	30.4589	26.6787	21.3011	24.4879	22.3922	23.9913	22.5556	25.6982	27.0679	30.18	27.7233	21.4698	21.8244
23	Non-Severe	Non-Severe	0.954546	0.0454545	18.9055	20.104	21.5412	28.6674	22.4615	27.4972	20.9755	18.5878	24.9721	23.4641	25.8083	27.9837	27.4077	24.2744	24.8562	29.381	21.2419	24.6582	18.8953	23.1859	24.8997	25.892	28.1458	22.7033	27.6186	30.3872	28.0835	24.8259	26.2862	23.2088	22.6188	24.1381	27.5312	26.7407	30.2696	26.1825	21.0468	24.3972
24	Severe	Severe	0.0634691	0.936531	24.169	23.3668	28.3492	28.904	25.2116	29.393	24.4216	22.3196	26.8049	26.363	28.8	30.8019	30.7235	24.6755	25.7835	31.6157	22.0974	28	22.4121	23.8409	24.6881	25.1466	28.0607	28.4052	26.9941	29.1347	25.2464	22.9707	23.1676	24.5282	22.7811	19.991	25.3451	23.5564	28.8262	22.3846	16.9864	18.1327
25	Severe	Severe	0.0106523	0.989348	23.7312	21.8426	26.1475	30.9974	26.7484	33.1732	25.0842	21.8997	27.1853	27.4341	29.6084	31.8023	29.8975	26.8655	26.2592	31.8677	25.6081	28.2703	28.9704	24.793	19.7335	20.8375	25.6896	19.423	25.0195	27.899	23.9707	21.7176	21.5416	21.5109	23.6259	21.7149	20.5161	22.5011	27.6623	19.4976	19.1566	21.7164
26	Severe	Severe	0.00366137	0.996339	21.2303	23.5884	25.0483	32.8069	24.3198	31.0659	22.7086	23.7314	26.5785	24.4948	28.3658	31.7155	28.8546	27.3506	24.1575	30.6888	19.4037	27.9902	19.6647	23.6636	24.3045	23.0382	26.5822	18.7066	24.7624	27.7023	24.3596	22.5697	21.7738	20.2673	19.8566	15.9481	22.9384	23.911	27.8973	24.8011	19.6301	15.9481
27	Non-Severe	Non-Severe	0.397226	0.602774	25.2277	25.9266	25.3595	28.561	24.6743	27.8113	22.4204	24.3709	26.502	23.3448	25.9238	31.1699	27.288	25.7822	21.6628	29.2046	25.2369	25.0274	25.9425	19.5144	24.2062	23.9015	24.7323	28.0428	25.4458	28.074	25.5573	22.1891	22.3794	21.5942	26.3073	21.7247	24.4466	24.8473	29.9746	24.5625	17.4459	23.4733
28	Non-Severe	Severe	0.120894	0.879106	25.8654	24.3079	21.3729	31.4029	26.419	29.836	25.0279	22.011	27.4381	28.0583	27.6045	31.8736	28.6629	25.5011	28.1461	29.9408	22.8881	25.685	24.7446	23.9983	23.2942	23.7979	26.9436	23.87	25.6161	27.1698	25.1406	23.5372	21.8998	20.7604	22.0922	20.9373	24.0123	24.3616	29.4901	24.6748	20.3756	20.0795
29	Severe	Severe	0.224458	0.775542	22.6544	22.8061	30.5166	27.0555	22.5709	26.4916	22.1258	21.3855	24.9355	23.4816	27.1589	28.092	29.8343	27.8582	23.992	29.1786	21.5538	28.5211	22.9729	23.3471	25.3425	23.3853	26.7384	24.7518	26.9583	29.2134	26.4058	24.3985	24.6118	23.431	21.8732	18.798	25.7203	24.3193	29.1935	24.502	22.2663	19.2799
30	Severe	Non-Severe	0.403967	0.596033	15.8949	19.9095	26.8488	26.8278	19.5978	26.674	21.8115	21.0573	25.1944	24.4167	27.4805	30.1847	28.6442	26.1963	24.9399	29.2846	20.7183	27.1389	22.2914	24.1695	25.4842	24.6986	27.893	27.3583	27.2918	29.6041	26.9088	22.5101	24.8707	24.2628	21.0507	19.8901	26.5596	26.4724	30.1292	21.0608	19.7508	20.5018
31	Severe	Non-Severe	0.52819	0.47181	17.6031	20.5042	24.9932	28.3641	22.019	25.7148	20.8779	19.7166	23.794	24.634	26.9082	29.19	28.5507	22.5625	25.1837	28.8694	21.4887	26.1206	21.2828	24.7227	23.7803	23.5982	28.0586	22.39	27.1927	29.8635	26.1654	25.0138	23.8283	21.3238	21.9913	21.3422	26.8528	25.9996	29.8465	28.5305	17.0571	19.8532
32	Non-Severe	Non-Severe	0.657881	0.342119	20.3591	19.4581	29.0213	28.4287	21.5217	27.6079	21.9651	21.5016	25.619	22.2789	27.3745	28.7677	27.5941	25.747	17.8871	28.6448	19.7156	25.4458	20.4974	22.3593	24.4208	24.624	27.8296	26.8526	27.0303	30.4123	26.5186	23.9145	24.5975	23.5329	22.3918	21.3808	26.5079	26.9971	29.1252	26.2271	24.4799	21.0334
33	Non-Severe	Non-Severe	0.566017	0.433983	19.5515	21.8538	25.6853	28.9737	25.2677	29.7638	23.2591	17.1146	28.5461	24.4884	28.8487	30.9076	30.0028	26.207	25.3274	30.7067	19.9751	26.4182	18.9716	23.4571	25.8205	25.1437	27.3575	28.2999	26.5312	29.2019	27.1576	23.417	23.4893	23.6538	21.5428	22.4339	25.3743	25.9018	30.6501	24.7451	18.6811	22.3837
34	Severe	Severe	0.406156	0.593844	17.9034	21.2197	29.0539	27.9011	21.7589	26.6594	22.5756	20.1019	24.4603	24.5085	26.6024	28.2397	28.9065	26.4479	24.3221	28.7035	20.9625	27.1504	21.8921	23.6518	25.5938	25.1412	28.7289	26.6037	27.3197	30.0892	27.0742	24.9282	24.1917	23.3876	23.5032	22.2435	27.1244	27.2447	30.1877	25.0737	20.3286	20.0482
35	Severe	Severe	0.00437257	0.995627	24.3827	25.2695	27.594	31.6196	26.9301	32.4839	26.6195	26.0628	27.5236	25.9967	29.6058	31.3086	30.8922	27.4691	28.5372	31.5644	23.765	27.9568	24.5926	26.81	21.0285	22.5375	26.7214	24.4285	24.6927	27.9695	25.1573	20.2495	22.3626	20.24	18.1437	19.8847	24.5943	24.6655	29.2595	25.2669	15.6577	20.0529
36	Severe	Severe	0.0230922	0.976908	26.7884	22.932	26.0794	30.8416	27.5697	31.8389	26.553	26.1553	28.1078	28.3634	29.8669	30.0764	30.4441	25.9459	27.6146	32.3863	25.2137	28.4258	19.9918	25.8215	23.4741	22.4282	26.3639	18.7633	26.2888	27.9413	25.76	20.6782	22.866	21.2499	18.8041	21.0093	25.0467	24.961	28.0094	26.7954	15.9342	19.2535
37	Non-Severe	Non-Severe	0.557213	0.442787	15.7508	21.2297	28.7483	28.1361	23.7945	26.7502	22.5208	20.9321	24.7224	24.5905	26.7412	27.821	28.1905	25.6847	23.8393	27.7494	21.6775	26.0313	18.3203	23.6141	25.2935	25.4366	28.6663	25.1689	27.2455	30.0162	26.8991	24.834	24.218	22.5432	22.0971	23.5512	26.9248	24.6057	30.4836	23.8648	26.4071	20.0368
38	Non-Severe	Non-Severe	0.757943	0.242057	20.6043	20.8692	23.3016	27.0597	23.3745	27.945	21.0581	19.8221	26.3748	23.8134	27.5084	28.2053	28.5545	21.0945	26.2162	29.1312	20.5099	25.9309	20.2541	22.0692	25.3206	24.9237	28.4691	22.747	26.4805	29.7813	27.4011	22.673	24.2814	21.0685	21.6888	22.66	26.0039	26.5172	30.0931	26.5304	18.5286	20.8737
39	Severe	Severe	0.241486	0.758514	19.568	19.1863	27.129	28.9839	24.0086	29.1189	22.9096	20.7813	26.7833	24.5725	27.8504	28.4795	28.4412	26.7757	24.5605	29.5497	21.682	26.4337	20.9783	24.4691	24.4871	24.1228	28.0945	23.0892	27.0052	29.8542	26.1356	22.4859	23.4117	22.948	22.0324	21.1021	25.6378	25.384	28.7818	23.5855	16.9182	19.7448
40	Severe	Severe	0.402118	0.597882	19.3083	20.7869	27.6194	27.5856	21.9547	26.7919	17.562	22.4878	23.9922	23.6178	26.8599	28.2205	28.4206	27.7811	23.1386	29.2136	21.0278	27.0209	21.6614	20.8705	24.5296	24.6828	28.2166	29.6464	26.9387	29.8735	26.2688	23.8538	24.5632	25.4625	21.0566	20.7738	25.2257	25.2254	28.2107	25.2863	20.0684	18.9689
41	Severe	Severe	0.406919	0.593081	21.7582	22.4332	24.2859	31.2026	24.216	26.9587	24.3823	18.8371	25.8751	26.0126	26.8236	30.2992	28.7466	25.854	26.0879	30.0711	22.6547	25.7626	19.6634	24.321	25.2626	24.4459	28.2993	25.8042	26.5265	29.8816	26.1459	24.7718	23.4171	20.0967	23.2515	19.6973	26.7439	26.0495	30.6245	22.2306	17.7233	20.8451
42	Non-Severe	Non-Severe	0.814934	0.185066	20.1718	21.0484	26.2436	27.7227	21.5925	25.2358	22.67	21.6186	24.2007	24.8422	26.2853	30.383	28.0906	24.913	18.3728	28.3551	20.3903	24.6024	20.6755	21.3982	26.1126	23.7636	27.625	29.3004	27.9595	29.8054	27.405	24.9004	24.5866	24.6326	22.0693	20.8421	27.0729	26.3423	30.629	23.1596	25.4399	20.2166
43	Severe	Non-Severe	0.811208	0.188792	15.6522	20.418	22.8969	27.4281	20.9936	25.3329	23.8375	19.6742	23.4496	23.403	26.986	28.7635	27.1761	25.2665	23.6427	29.6508	20.4287	26.8118	18.6728	23.583	25.7167	26.5317	28.666	22.7166	26.6683	29.9268	27.2259	24.2701	25.1007	23.5001	22.2142	20.6525	26.7401	28.5047	31.343	28.0654	20.3337	23.3098
44	Severe	Severe	0.0908304	0.90917	23.2594	20.0833	26.3564	29.3421	23.5379	28.0645	22.881	23.1629	26.0469	25.7659	28.7095	30.5403	29.8593	25.9403	25.14	30.5715	21.4765	26.8775	20.8248	25.4386	23.3141	23.2174	26.7129	18.8399	26.9063	28.881	26.369	23.4463	24.0203	23.0959	19.4407	20.3038	25.8787	26.0618	30.3978	20.1413	19.8673	17.9375
45	Severe	Severe	0.193527	0.806473	18.55	25.5372	21.4726	31.6697	26.6471	29.962	24.9694	21.0922	26.7283	27.2859	28.0091	32.791	30.5115	25.4493	27.0209	30.0556	22.4064	25.4826	25.2392	23.806	23.405	22.5683	25.8917	28.5121	24.7894	27.5811	23.7786	19.9401	22.0108	21.0895	20.7433	20.0961	23.7813	24.5991	28.7689	24.9306	21.6092	19.2357
46	Severe	Severe	0.410552	0.589448	19.6816	20.4488	24.6585	30.3603	22.6374	27.4732	22.1064	19.8072	25.3722	25.4161	26.8336	29.1125	28.5496	23.9536	24.1204	29.7809	21.3927	26.6741	20.8922	24.6342	24.1883	23.811	28.3619	22.2622	26.6819	29.9452	26.4162	23.7632	23.5665	21.2474	22.0223	22.0215	26.0839	25.7176	29.5491	27.2736	18.1857	20.5342
47	Non-Severe	Non-Severe	0.807649	0.192351	18.968	16.9211	23.6289	28.6497	23.4801	27.933	23.5062	21.7036	26.1698	24.9489	26.7653	28.4677	28.0287	24.9576	23.0283	29.5999	21.4398	24.647	19.787	22.3154	24.81	24.5277	28.0586	25.1825	27.5891	29.6524	27.9313	25.7027	25.0706	22.9051	22.2866	19.1568	26.3713	26.5489	31.5171	26.2975	19.227	22.3051
48	Severe	Severe	0.134753	0.865247	25.0053	23.5153	28.7331	28.678	24.9159	28.2451	24.9024	22.8065	26.948	27.0019	29.7261	30.7274	30.3618	26.1562	28.3493	30.7232	23.3635	27.3465	20.5669	22.8238	26.6223	24.7994	28.0954	22.9668	25.7025	29.6592	26.0923	21.5754	23.9649	23.2871	24.2623	19.6522	25.4355	22.9085	28.6415	22.1143	15.3465	20.0898
49	Severe	Severe	0.00918118	0.990819	26.5693	26.8259	25.7704	31.3926	27.5229	30.1512	25.667	23.6502	27.7433	28.3849	29.5067	30.3044	29.9939	28.6606	27.0338	32.4838	23.9044	26.7984	20.8344	25.057	22.6283	22.9817	26.9058	20.2241	25.204	27.8984	25.6551	22.395	21.7975	19.3913	22.3832	18.8932	24.1496	24.028	27.5107	26.6935	14.5933	17.5182
50	Severe	Severe	0.0998084	0.900192	25.182	26.8502	23.3112	30.8548	27.9355	30.7521	27.7276	25.5293	28.5045	27.4865	28.9977	30.8569	30.377	26.823	28.3189	32.3863	24.3651	27.4872	23.1094	24.8743	24.3803	25.3981	26.8263	19.8333	24.5026	28.7361	26.2763	22.7724	23.5626	21.5572	20.0599	24.0744	25.7331	25.3103	28.5347	20.7359	14.5115	22.8466
51	Severe	Severe	0.0758949	0.924105	22.1577	24.4163	23.6715	32.7681	25.6821	30.9262	25.9379	22.7299	27.3283	25.8301	28.0277	31.8709	28.9118	23.4095	25.3276	30.7091	22.0463	26.8873	21.5899	24.0721	23.9786	23.635	26.9276	25.3994	24.9797	28.4451	25.2856	20.1254	19.8882	21.6617	18.4733	20.3389	23.8323	26.224	29.2579	26.5677	15.8503	19.111

## Sheet: 20_VIP_Score_SVM_Model
Supplementary Table S5: Consolidated sheet of machine learning output file
SL.No.	Category	SVM	SVM (Non-Severe)	SVM (Severe)	APCS	LCP1	SERPINA4	SEMG2	LPA	C4B	PI16	SERPINA7	S100A8	SERPINA3	SERPINA6	FGG	TPM4	IGFBP3	CA1	SERPIND1	CFD	AZGP1	GPX3	APOB
1	Non-Severe	Non-Severe	0.924869	0.0751306	20.2692	18.5183	17.8474	20.4997	23.4516	24.0405	22.4145	21.3961	20.7703	24.836	22.8817	27.6967	26.3063	25.2664	24.3065	24.8701	26.5456	25.2751	23.1416	29.3208
2	Non-Severe	Non-Severe	0.991933	0.0080666	18.0972	18.3402	18.5393	23.65	25.2881	24.6884	24.0919	21.195	22.6081	25.6924	22.4822	28.0053	27.4246	25.2877	22.5817	25.1905	27.2933	24.9992	21.7547	29.3033
3	Severe	Severe	0.00415852	0.995841	26.0674	25.9129	26.7477	15.9057	26.6562	28.3841	18.2269	25.5869	27.792	31.4416	27.1761	30.8391	22.7536	19.1472	28.9592	28.4473	24.3117	28.4309	24.4561	31.334
4	Severe	Severe	1.39063e-05	0.999986	28.2909	24.9042	24.3411	15.7209	22.9493	27.1506	19.5693	26.5992	27.2418	31.6277	27.5101	32.067	23.9252	19.0401	30.1939	27.5522	22.4699	27.5256	25.0742	31.5167
5	Severe	Severe	0.11298	0.88702	25.7663	23.0333	26.4693	28.8188	22.6527	24.1902	20.6175	25.8486	26.8192	31.5775	27.0339	31.0177	22.9407	22.4352	28.6795	28.4739	22.2752	28.216	25.3181	31.8264
6	Severe	Severe	0.0204034	0.979597	26.9369	22.689	22.8589	14.2981	24.6086	28.3481	19.845	26.3437	24.7316	30.5422	25.9872	31.1218	24.1098	17.07	26.7035	27.5055	23.3484	26.6991	24.4711	30.0451
7	Non-Severe	Non-Severe	0.539421	0.460579	18.6859	18.7989	17.6057	18.5324	25.4657	25.8608	20.8533	23.6096	23.0468	26.7196	22.2454	27.8566	26.6446	23.579	24.065	24.8853	24.8442	26.1093	23.8124	29.2051
8	Non-Severe	Severe	0.296615	0.703385	18.567	19.8093	23.0835	20.7455	24.6527	25.5467	20.0793	22.7828	24.0034	28.8285	25.5629	29.8769	24.4921	23.5041	25.9057	27.6632	24.6504	26.0135	24.3793	30.6263
9	Severe	Non-Severe	0.601805	0.398195	20.5963	20.1089	17.091	16.486	26.9882	23.6703	22.3681	23.0374	25.6182	26.8671	22.2622	28.7814	26.9781	24.3239	25.0171	24.2057	24.6528	24.9034	23.9193	28.7287
10	Severe	Severe	0.315428	0.684572	15.8694	24.5026	17.2419	15.0737	23.9477	24.8342	23.7981	22.4638	31.3236	28.399	23.2527	28.1937	24.3578	22.9025	25.7839	24.6594	24.7423	27.0348	23.2545	29.0512
11	Severe	Severe	0.0276345	0.972365	25.707	23.1073	24.9284	18.7909	21.8303	28.3695	19.5089	26.7813	26.9232	31.8637	26.9331	31.9875	23.5598	22.8933	25.3593	27.3849	24.1161	28.168	24.1584	32.0672
12	Non-Severe	Non-Severe	0.808395	0.191605	18.7774	16.7494	19.9908	16.1965	28.6224	23.6471	22.8213	22.8039	22.0384	25.9524	22.2807	27.9041	27.1109	24.7966	24.1208	25.2434	25.7649	25.7143	24.3418	29.268
13	Non-Severe	Non-Severe	0.856415	0.143585	19.879	20.2815	15.4824	20.6472	30.2426	24.4328	22.4014	23.1912	21.2883	26.5119	22.7412	27.7416	27.1141	25.2295	23.5891	25.6246	25.7675	25.55	23.6858	29.1007
14	Severe	Severe	0.00631516	0.993685	26.7053	26.1427	26.4271	19.8965	16.6351	27.4015	19.863	25.8919	27.0601	31.3337	27.1164	30.6368	17.8314	23.2894	27.3704	29.5897	22.2295	28.4407	25.7209	31.8046
15	Severe	Severe	0.0260152	0.973985	26.517	22.155	25.2819	18.9823	23.1744	27.2687	17.5588	25.9228	23.7175	32.1007	26.7918	31.7238	20.459	17.9799	25.2599	28.5354	22.9166	27.7785	25.4859	31.5626
16	Severe	Severe	0.106167	0.893833	22.4691	25.2977	27.7186	14.7007	25.2407	27.3879	18.8382	25.9016	23.1537	28.4506	27.1328	28.0734	26.3689	23.7327	25.0861	27.8893	24.9812	28.5565	24.6037	32.4207
17	Non-Severe	Non-Severe	0.825765	0.174235	20.272	22.3081	20.9963	21.5721	24.4492	25.9638	21.818	17.0545	25.3757	28.5992	24.1219	27.4435	27.2579	24.3972	23.8779	23.0833	27.075	27.2435	20.5654	29.1312
18	Non-Severe	Non-Severe	0.719296	0.280704	16.426	20.8976	17.9843	19.6489	25.0521	24.9563	22.2232	24.1865	22.8132	28.7413	24.3573	27.5491	26.6153	22.1745	24.9762	24.7348	25.3896	26.0429	23.7758	29.4934
19	Severe	Severe	0.0838713	0.916129	26.2611	25.5812	24.0764	20.5504	25.772	27.6362	19.3374	24.5434	22.8923	30.4911	27.1469	30.6924	27.0694	21.3126	26.5048	28.0197	22.6658	27.8139	23.9169	32.7058
20	Severe	Severe	0.046214	0.953786	28.7163	23.6529	22.4263	19.567	25.3564	28.8733	17.0822	27.2068	24.1957	31.3194	26.9006	31.3836	26.1091	23.3692	23.7922	28.1246	21.6293	26.5614	25.5765	31.3927
21	Severe	Severe	0.222998	0.777002	26.9632	24.4834	24.826	21.5355	24.6581	24.0967	18.3345	24.9798	24.5934	30.3488	26.7264	32.2736	23.9307	23.0165	25.7871	27.7093	23.6172	26.2565	22.7757	32.1291
22	Non-Severe	Non-Severe	0.799208	0.200792	20.617	20.5929	20.2376	21.4698	26.1152	22.0485	21.8244	21.8604	22.9081	27.4532	19.2336	27.4559	27.7233	21.3011	24.3094	24.6842	26.4561	26.0051	23.0756	29.1242
23	Non-Severe	Non-Severe	0.929093	0.0709066	20.104	18.5878	18.9055	21.0468	22.7033	24.8562	24.3972	20.9755	21.5412	27.4972	22.4615	28.6674	26.1825	24.8259	24.2744	23.4641	24.8997	24.6582	23.1859	29.381
24	Severe	Severe	0.0514806	0.948519	23.3668	22.3196	24.169	16.9864	28.4052	25.7835	18.1327	24.4216	28.3492	29.393	25.2116	28.904	22.3846	22.9707	24.6755	26.363	24.6881	28	23.8409	31.6157
25	Severe	Severe	0.0227518	0.977248	21.8426	21.8997	23.7312	19.1566	19.423	26.2592	21.7164	25.0842	26.1475	33.1732	26.7484	30.9974	19.4976	21.7176	26.8655	27.4341	19.7335	28.2703	24.793	31.8677
26	Severe	Severe	0.011175	0.988825	23.5884	23.7314	21.2303	19.6301	18.7066	24.1575	15.9481	22.7086	25.0483	31.0659	24.3198	32.8069	24.8011	22.5697	27.3506	24.4948	24.3045	27.9902	23.6636	30.6888
27	Non-Severe	Non-Severe	0.540177	0.459823	25.9266	24.3709	25.2277	17.4459	28.0428	21.6628	23.4733	22.4204	25.3595	27.8113	24.6743	28.561	24.5625	22.1891	25.7822	23.3448	24.2062	25.0274	19.5144	29.2046
28	Non-Severe	Severe	0.129861	0.870139	24.3079	22.011	25.8654	20.3756	23.87	28.1461	20.0795	25.0279	21.3729	29.836	26.419	31.4029	24.6748	23.5372	25.5011	28.0583	23.2942	25.685	23.9983	29.9408
29	Severe	Severe	0.227719	0.772281	22.8061	21.3855	22.6544	22.2663	24.7518	23.992	19.2799	22.1258	30.5166	26.4916	22.5709	27.0555	24.502	24.3985	27.8582	23.4816	25.3425	28.5211	23.3471	29.1786
30	Severe	Severe	0.356843	0.643157	19.9095	21.0573	15.8949	19.7508	27.3583	24.9399	20.5018	21.8115	26.8488	26.674	19.5978	26.8278	21.0608	22.5101	26.1963	24.4167	25.4842	27.1389	24.1695	29.2846
31	Severe	Non-Severe	0.547773	0.452227	20.5042	19.7166	17.6031	17.0571	22.39	25.1837	19.8532	20.8779	24.9932	25.7148	22.019	28.3641	28.5305	25.0138	22.5625	24.634	23.7803	26.1206	24.7227	28.8694
32	Non-Severe	Non-Severe	0.555284	0.444716	19.4581	21.5016	20.3591	24.4799	26.8526	17.8871	21.0334	21.9651	29.0213	27.6079	21.5217	28.4287	26.2271	23.9145	25.747	22.2789	24.4208	25.4458	22.3593	28.6448
33	Non-Severe	Severe	0.389682	0.610318	21.8538	17.1146	19.5515	18.6811	28.2999	25.3274	22.3837	23.2591	25.6853	29.7638	25.2677	28.9737	24.7451	23.417	26.207	24.4884	25.8205	26.4182	23.4571	30.7067
34	Severe	Severe	0.205137	0.794863	21.2197	20.1019	17.9034	20.3286	26.6037	24.3221	20.0482	22.5756	29.0539	26.6594	21.7589	27.9011	25.0737	24.9282	26.4479	24.5085	25.5938	27.1504	23.6518	28.7035
35	Severe	Severe	0.00674399	0.993256	25.2695	26.0628	24.3827	15.6577	24.4285	28.5372	20.0529	26.6195	27.594	32.4839	26.9301	31.6196	25.2669	20.2495	27.4691	25.9967	21.0285	27.9568	26.81	31.5644
36	Severe	Severe	0.0213959	0.978604	22.932	26.1553	26.7884	15.9342	18.7633	27.6146	19.2535	26.553	26.0794	31.8389	27.5697	30.8416	26.7954	20.6782	25.9459	28.3634	23.4741	28.4258	25.8215	32.3863
37	Non-Severe	Severe	0.48913	0.51087	21.2297	20.9321	15.7508	26.4071	25.1689	23.8393	20.0368	22.5208	28.7483	26.7502	23.7945	28.1361	23.8648	24.834	25.6847	24.5905	25.2935	26.0313	23.6141	27.7494
38	Non-Severe	Non-Severe	0.867368	0.132632	20.8692	19.8221	20.6043	18.5286	22.747	26.2162	20.8737	21.0581	23.3016	27.945	23.3745	27.0597	26.5304	22.673	21.0945	23.8134	25.3206	25.9309	22.0692	29.1312
39	Severe	Severe	0.196308	0.803692	19.1863	20.7813	19.568	16.9182	23.0892	24.5605	19.7448	22.9096	27.129	29.1189	24.0086	28.9839	23.5855	22.4859	26.7757	24.5725	24.4871	26.4337	24.4691	29.5497
40	Severe	Non-Severe	0.67179	0.32821	20.7869	22.4878	19.3083	20.0684	29.6464	23.1386	18.9689	17.562	27.6194	26.7919	21.9547	27.5856	25.2863	23.8538	27.7811	23.6178	24.5296	27.0209	20.8705	29.2136
41	Severe	Severe	0.390393	0.609607	22.4332	18.8371	21.7582	17.7233	25.8042	26.0879	20.8451	24.3823	24.2859	26.9587	24.216	31.2026	22.2306	24.7718	25.854	26.0126	25.2626	25.7626	24.321	30.0711
42	Non-Severe	Non-Severe	0.918488	0.0815117	21.0484	21.6186	20.1718	25.4399	29.3004	18.3728	20.2166	22.67	26.2436	25.2358	21.5925	27.7227	23.1596	24.9004	24.913	24.8422	26.1126	24.6024	21.3982	28.3551
43	Severe	Non-Severe	0.826299	0.173701	20.418	19.6742	15.6522	20.3337	22.7166	23.6427	23.3098	23.8375	22.8969	25.3329	20.9936	27.4281	28.0654	24.2701	25.2665	23.403	25.7167	26.8118	23.583	29.6508
44	Severe	Severe	0.0309017	0.969098	20.0833	23.1629	23.2594	19.8673	18.8399	25.14	17.9375	22.881	26.3564	28.0645	23.5379	29.3421	20.1413	23.4463	25.9403	25.7659	23.3141	26.8775	25.4386	30.5715
45	Severe	Severe	0.412143	0.587857	25.5372	21.0922	18.55	21.6092	28.5121	27.0209	19.2357	24.9694	21.4726	29.962	26.6471	31.6697	24.9306	19.9401	25.4493	27.2859	23.405	25.4826	23.806	30.0556
46	Severe	Severe	0.37702	0.62298	20.4488	19.8072	19.6816	18.1857	22.2622	24.1204	20.5342	22.1064	24.6585	27.4732	22.6374	30.3603	27.2736	23.7632	23.9536	25.4161	24.1883	26.6741	24.6342	29.7809
47	Non-Severe	Non-Severe	0.853908	0.146092	16.9211	21.7036	18.968	19.227	25.1825	23.0283	22.3051	23.5062	23.6289	27.933	23.4801	28.6497	26.2975	25.7027	24.9576	24.9489	24.81	24.647	22.3154	29.5999
48	Severe	Severe	0.0797599	0.92024	23.5153	22.8065	25.0053	15.3465	22.9668	28.3493	20.0898	24.9024	28.7331	28.2451	24.9159	28.678	22.1143	21.5754	26.1562	27.0019	26.6223	27.3465	22.8238	30.7232
49	Severe	Severe	0.00939101	0.990609	26.8259	23.6502	26.5693	14.5933	20.2241	27.0338	17.5182	25.667	25.7704	30.1512	27.5229	31.3926	26.6935	22.395	28.6606	28.3849	22.6283	26.7984	25.057	32.4838
50	Severe	Severe	0.0393995	0.9606	26.8502	25.5293	25.182	14.5115	19.8333	28.3189	22.8466	27.7276	23.3112	30.7521	27.9355	30.8548	20.7359	22.7724	26.823	27.4865	24.3803	27.4872	24.8743	32.3863
51	Severe	Severe	0.159423	0.840577	24.4163	22.7299	22.1577	15.8503	25.3994	25.3276	19.111	25.9379	23.6715	30.9262	25.6821	32.7681	26.5677	20.1254	23.4095	25.8301	23.9786	26.8873	24.0721	30.7091
