# Supplementary material for: Proteomics and Machine Learning Approaches Reveal a Set of Prognostic Markers for COVID-19 Severity With Drug Repurposing Potential
Source: Front Physiol. 2021 Apr 27;12:652799. doi: 10.3389/fphys.2021.652799 (PMC8120435; doi:10.3389/fphys.2021.652799)
Supplement: Supplementary Table 6 — List of peptides and transitions used for MRM analysis. [file Table_6.xlsx]

## Sheet: Supplementary Table S6
Supplementary Table S6: List of peptide sequences and transitions of proteins that showed differential regulation between COVID-19 non-severe and severe patient samples
Compound	Start Time (min)	End Time (min)	Polarity	Precursor (m/z)	Product (m/z)	Collision Energy (V)
FEDGVLDPDYPR (heavy)(+2)	0	10	Positive	716.834	1156.55	24.3
FEDGVLDPDYPR (heavy)(+2)	0	10	Positive	716.834	1041.52	24.3
FEDGVLDPDYPR (heavy)(+2)	0	10	Positive	716.834	984.502	24.3
FEDGVLDPDYPR (heavy)(+2)	0	10	Positive	716.834	885.434	24.3
FEDGVLDPDYPR (heavy)(+2)	0	10	Positive	716.834	772.35	24.3
FEDGVLDPDYPR (heavy)(+2)	0	10	Positive	716.834	657.323	24.3
FEDGVLDPDYPR (heavy)(+2)	0	10	Positive	716.834	560.27	24.3
FEDGVLDPDYPR (heavy)(+2)	0	10	Positive	716.834	445.243	24.3
FEDGVLDPDYPR (heavy)(+2)	0	10	Positive	716.834	282.18	24.3
FEDGVLDPDYPR (heavy)(+2)	0	10	Positive	716.834	578.779	24.3
FEDGVLDPDYPR (heavy)(+2).2	0	10	Positive	716.834	521.266	24.3
FEDGVLDPDYPR (heavy)(+2).2	0	10	Positive	716.834	492.755	24.3
FEDGVLDPDYPR (heavy)(+2).2	0	10	Positive	716.834	443.221	24.3
FEDGVLDPDYPR (heavy)(+2).2	0	10	Positive	716.834	386.679	24.3
FEDGVLDPDYPR (heavy)(+2).2	0	10	Positive	716.834	329.165	24.3
FEDGVLDPDYPR (heavy)(+2).2	0	10	Positive	716.834	280.639	24.3
FEDGVLDPDYPR (heavy)(+2).2	0	10	Positive	716.834	223.125	24.3
FEDGVLDPDYPR (heavy)(+2).2	0	10	Positive	716.834	141.594	24.3
SLDFTELDVAAEK(+2)	0	10	Positive	719.359	1237.59	24.5
SLDFTELDVAAEK(+2)	0	10	Positive	719.359	1122.57	24.5
SLDFTELDVAAEK(+2)	0	10	Positive	719.359	975.499	24.5
SLDFTELDVAAEK(+2)	0	10	Positive	719.359	874.452	24.5
SLDFTELDVAAEK(+2)	0	10	Positive	719.359	745.409	24.5
SLDFTELDVAAEK(+2)	0	10	Positive	719.359	418.23	24.5
SLDFTELDVAAEK(+2)	0	10	Positive	719.359	347.193	24.5
ALQDQLVLVAAK(+2)	0	10	Positive	634.882	1084.64	22
ALQDQLVLVAAK(+2)	0	10	Positive	634.882	956.578	22
ALQDQLVLVAAK(+2)	0	10	Positive	634.882	600.408	22
ALQDQLVLVAAK(+2)	0	10	Positive	634.882	501.34	22
ALQDQLVLVAAK(+2)	0	10	Positive	634.882	388.255	22
ALQDQLVLVAAK(+2)	0	10	Positive	634.882	289.187	22
DPTFIPAPIQAK(+2)	0	10	Positive	649.361	837.519	22.4
DPTFIPAPIQAK(+2)	0	10	Positive	649.361	724.435	22.4
DPTFIPAPIQAK(+2)	0	10	Positive	649.361	556.345	22.4
DPTFIPAPIQAK(+2)	0	10	Positive	649.361	314.195	22.4
TEVIPPLIENR(+2)	0	10	Positive	640.864	1050.63	22.1
TEVIPPLIENR(+2)	0	10	Positive	640.864	951.562	22.1
TEVIPPLIENR(+2)	0	10	Positive	640.864	838.478	22.1
TEVIPPLIENR(+2)	0	10	Positive	640.864	741.425	22.1
SVGFHLPSR(+3)	0	10	Positive	333.85	472.288	15
SVGFHLPSR(+3)	0	10	Positive	333.85	359.204	15
SVGFHLPSR(+3)	0	10	Positive	333.85	407.222	15
SVGFHLPSR(+3)	0	10	Positive	333.85	305.177	15
FPEVDVLTK(+2)	0	10	Positive	524.289	900.504	18.6
FPEVDVLTK(+2)	0	10	Positive	524.289	803.451	18.6
FPEVDVLTK(+2)	0	10	Positive	524.289	674.408	18.6
FPEVDVLTK(+2)	0	10	Positive	524.289	575.34	18.6
FPEVDVLTK(+2)	0	10	Positive	524.289	460.313	18.6
FPEVDVLTK(+2)	0	10	Positive	524.289	361.245	18.6
FPEVDVLTK(+2)	0	10	Positive	524.289	450.755	18.6
FPEVDVLTK(+2)	0	10	Positive	524.289	245.128	18.6
AVSMPSFSILGSDVR(+2)	0	10	Positive	783.403	1395.69	26.4
AVSMPSFSILGSDVR(+2)	0	10	Positive	783.403	1308.66	26.4
AVSMPSFSILGSDVR(+2)	0	10	Positive	783.403	1177.62	26.4
AVSMPSFSILGSDVR(+2)	0	10	Positive	783.403	1080.57	26.4
AVSMPSFSILGSDVR(+2)	0	10	Positive	783.403	646.352	26.4
AVSMPSFSILGSDVR(+2)	0	10	Positive	783.403	533.268	26.4
AVSMPSFSILGSDVR(+2)	0	10	Positive	783.403	389.214	26.4
AVSMPSFSILGSDVR(+2)	0	10	Positive	783.403	589.314	26.4
ITLPDFR(+2)	0	10	Positive	431.245	647.351	15.8
ITLPDFR(+2)	0	10	Positive	431.245	534.267	15.8
ITLPDFR(+2)	0	10	Positive	431.245	437.214	15.8
ITLPDFR(+2)	0	10	Positive	431.245	324.179	15.8
ITLPDFR(+2)	0	10	Positive	431.245	267.637	15.8
ITLPDFR(+2)	0	10	Positive	431.245	219.111	15.8
ADLSGITGAR(+2)	0	10	Positive	480.759	774.447	17.3
ADLSGITGAR(+2)	0	10	Positive	480.759	661.363	17.3
ADLSGITGAR(+2)	0	10	Positive	480.759	574.331	17.3
ADLSGITGAR(+2)	0	10	Positive	480.759	517.309	17.3
ADLSGITGAR(+2)	0	10	Positive	480.759	404.225	17.3
ADLSGITGAR(+2)	0	10	Positive	480.759	303.178	17.3
ITLLSALVETR(+2)	0	10	Positive	608.368	1102.65	21.2
ITLLSALVETR(+2)	0	10	Positive	608.368	1001.6	21.2
ITLLSALVETR(+2)	0	10	Positive	608.368	888.515	21.2
ITLLSALVETR(+2)	0	10	Positive	608.368	775.431	21.2
ITLLSALVETR(+2)	0	10	Positive	608.368	688.399	21.2
ITLLSALVETR(+2)	0	10	Positive	608.368	617.362	21.2
ITLLSALVETR(+2)	0	10	Positive	608.368	276.167	21.2
EIGELYLPK(+2)	0	10	Positive	531.297	819.461	18.8
EIGELYLPK(+2)	0	10	Positive	531.297	633.397	18.8
EIGELYLPK(+2)	0	10	Positive	531.297	520.313	18.8
EIGELYLPK(+2)	0	10	Positive	531.297	357.25	18.8
EIGELYLPK(+2)	0	10	Positive	531.297	244.166	18.8
NLAVSQVVHK(+2)	0	10	Positive	547.819	867.505	19.3
NLAVSQVVHK(+2)	0	10	Positive	547.819	796.468	19.3
NLAVSQVVHK(+2)	0	10	Positive	547.819	697.399	19.3
NLAVSQVVHK(+2)	0	10	Positive	547.819	383.24	19.3
NLAVSQVVHK(+2)	0	10	Positive	547.819	284.172	19.3
EQLSLLDR(+2)	0	10	Positive	487.269	716.43	17.5
EQLSLLDR(+2)	0	10	Positive	487.269	603.346	17.5
EQLSLLDR(+2)	0	10	Positive	487.269	516.314	17.5
EQLSLLDR(+2)	0	10	Positive	487.269	403.23	17.5
EQLSLLDR(+2)	0	10	Positive	487.269	290.146	17.5
YEASILTHDSSIR(+3)	0	10	Positive	497.919	928.485	21.2
YEASILTHDSSIR(+3)	0	10	Positive	497.919	815.401	21.2
YEASILTHDSSIR(+3)	0	10	Positive	497.919	714.353	21.2
YEASILTHDSSIR(+3)	0	10	Positive	497.919	577.294	21.2
YEASILTHDSSIR(+3)	0	10	Positive	497.919	462.267	21.2
IHLISTQSAIPYALR(+3)	0	10	Positive	561.657	890.509	23.6
IHLISTQSAIPYALR(+3)	0	10	Positive	561.657	732.44	23.6
IHLISTQSAIPYALR(+3)	0	10	Positive	561.657	619.356	23.6
IHLISTQSAIPYALR(+3)	0	10	Positive	561.657	310.182	23.6
IHLISTQSAIPYALR(+3)	0	10	Positive	561.657	364.234	23.6
VELEDWNGR(+2)	0	10	Positive	559.267	1018.46	19.7
VELEDWNGR(+2)	0	10	Positive	559.267	889.416	19.7
VELEDWNGR(+2)	0	10	Positive	559.267	776.332	19.7
VELEDWNGR(+2)	0	10	Positive	559.267	647.29	19.7
VELEDWNGR(+2)	0	10	Positive	559.267	532.263	19.7
VELEDWNGR(+2)	0	10	Positive	559.267	346.183	19.7
TSTADYAMFK(+2)	0	10	Positive	567.76	946.434	19.9
TSTADYAMFK(+2)	0	10	Positive	567.76	845.386	19.9
TSTADYAMFK(+2)	0	10	Positive	567.76	774.349	19.9
TSTADYAMFK(+2)	0	10	Positive	567.76	659.322	19.9
TSTADYAMFK(+2)	0	10	Positive	567.76	496.259	19.9
TSTADYAMFK(+2)	0	10	Positive	567.76	425.222	19.9
TSTADYAMFK(+2)	0	10	Positive	567.76	294.181	19.9
QSGLYFIKPLK(+3)	0	10	Positive	431.923	908.56	18.7
QSGLYFIKPLK(+3)	0	10	Positive	431.923	745.497	18.7
QSGLYFIKPLK(+3)	0	10	Positive	431.923	598.429	18.7
QSGLYFIKPLK(+3)	0	10	Positive	431.923	485.345	18.7
QSGLYFIKPLK(+3)	0	10	Positive	431.923	357.25	18.7
TNLESILSYPK(+2)	0	10	Positive	632.842	1049.59	21.9
TNLESILSYPK(+2)	0	10	Positive	632.842	936.504	21.9
TNLESILSYPK(+2)	0	10	Positive	632.842	807.461	21.9
TNLESILSYPK(+2)	0	10	Positive	632.842	607.345	21.9
TNLESILSYPK(+2)	0	10	Positive	632.842	494.261	21.9
TNLESILSYPK(+2)	0	10	Positive	632.842	407.229	21.9
TNLESILSYPK(+2)	0	10	Positive	632.842	244.166	21.9
LLDSLPSDTR(+2)	0	10	Positive	558.798	1003.51	19.7
LLDSLPSDTR(+2)	0	10	Positive	558.798	890.421	19.7
LLDSLPSDTR(+2)	0	10	Positive	558.798	775.394	19.7
LLDSLPSDTR(+2)	0	10	Positive	558.798	688.362	19.7
LLDSLPSDTR(+2)	0	10	Positive	558.798	575.278	19.7
LLDSLPSDTR(+2)	0	10	Positive	558.798	276.167	19.7
LYHAFSAMK(+3)	0	10	Positive	356.516	654.328	15.8
LYHAFSAMK(+3)	0	10	Positive	356.516	583.291	15.8
LYHAFSAMK(+3)	0	10	Positive	356.516	436.222	15.8
LYHAFSAMK(+3)	0	10	Positive	356.516	349.19	15.8
LYHAFSAMK(+3)	0	10	Positive	356.516	278.153	15.8
LYHAFSAMK(+3)	0	10	Positive	356.516	477.729	15.8
LYHAFSAMK(+3)	0	10	Positive	356.516	414.214	15.8
LYHAFSAMK(+3)	0	10	Positive	356.516	395.698	15.8
DFTC[+57.021464]VHQALK(+3)	0	10	Positive	406.869	855.451	17.7
DFTC[+57.021464]VHQALK(+3)	0	10	Positive	406.869	695.42	17.7
DFTC[+57.021464]VHQALK(+3)	0	10	Positive	406.869	596.351	17.7
DFTC[+57.021464]VHQALK(+3)	0	10	Positive	406.869	331.234	17.7
DFTC[+57.021464]VHQALK(+3)	0	10	Positive	406.869	478.753	17.7
FQPTLLTLPR(+2)	0	10	Positive	593.353	910.572	20.7
FQPTLLTLPR(+2)	0	10	Positive	593.353	813.519	20.7
FQPTLLTLPR(+2)	0	10	Positive	593.353	712.472	20.7
FQPTLLTLPR(+2)	0	10	Positive	593.353	599.388	20.7
FQPTLLTLPR(+2)	0	10	Positive	593.353	486.303	20.7
FQPTLLTLPR(+2)	0	10	Positive	593.353	385.256	20.7
FQPTLLTLPR(+2)	0	10	Positive	593.353	272.172	20.7
LVLLNAIYLSAK(+2)	0	10	Positive	659.41	1105.66	22.7
LVLLNAIYLSAK(+2)	0	10	Positive	659.41	879.493	22.7
LVLLNAIYLSAK(+2)	0	10	Positive	659.41	765.451	22.7
LVLLNAIYLSAK(+2)	0	10	Positive	659.41	581.329	22.7
LVLLNAIYLSAK(+2)	0	10	Positive	659.41	305.182	22.7
NALFC[+57.021464]LESAWK(+2)	0	10	Positive	669.829	1040.49	23
NALFC[+57.021464]LESAWK(+2)	0	10	Positive	669.829	893.419	23
NALFC[+57.021464]LESAWK(+2)	0	10	Positive	669.829	733.388	23
NALFC[+57.021464]LESAWK(+2)	0	10	Positive	669.829	620.304	23
NALFC[+57.021464]LESAWK(+2)	0	10	Positive	669.829	491.261	23
NALFC[+57.021464]LESAWK(+2)	0	10	Positive	669.829	404.229	23
LLETEC[+57.021464]PQYIR(+2)	0	10	Positive	711.358	1066.5	24.2
LLETEC[+57.021464]PQYIR(+2)	0	10	Positive	711.358	965.451	24.2
LLETEC[+57.021464]PQYIR(+2)	0	10	Positive	711.358	836.408	24.2
LLETEC[+57.021464]PQYIR(+2)	0	10	Positive	711.358	676.378	24.2
LLETEC[+57.021464]PQYIR(+2)	0	10	Positive	711.358	451.266	24.2
YSLTYIYTGLSK(+2)	0	10	Positive	704.871	1045.56	24.1
YSLTYIYTGLSK(+2)	0	10	Positive	704.871	944.509	24.1
YSLTYIYTGLSK(+2)	0	10	Positive	704.871	781.445	24.1
YSLTYIYTGLSK(+2)	0	10	Positive	704.871	668.361	24.1
YSLTYIYTGLSK(+2)	0	10	Positive	704.871	505.298	24.1
YSLTYIYTGLSK(+2)	0	10	Positive	704.871	404.25	24.1
YSLTYIYTGLSK(+2)	0	10	Positive	704.871	347.229	24.1
IFFYDSENPPASEVLR(+2)	0	10	Positive	942.462	1476.7	31.2
IFFYDSENPPASEVLR(+2)	0	10	Positive	942.462	1313.63	31.2
IFFYDSENPPASEVLR(+2)	0	10	Positive	942.462	1198.61	31.2
IFFYDSENPPASEVLR(+2)	0	10	Positive	942.462	982.532	31.2
IFFYDSENPPASEVLR(+2)	0	10	Positive	942.462	868.489	31.2
IFFYDSENPPASEVLR(+2)	0	10	Positive	942.462	603.346	31.2
