# Supplementary material for: Proteomics and Machine Learning Approaches Reveal a Set of Prognostic Markers for COVID-19 Severity With Drug Repurposing Potential
Source: Front Physiol. 2021 Apr 27;12:652799. doi: 10.3389/fphys.2021.652799 (PMC8120435; doi:10.3389/fphys.2021.652799)
Supplement: Supplementary Table 8 — List of FDA approved, Clinical and Pre-clinical drugs used in docking study. [file Table_8.xlsx]

## Sheet: Supplementary Table S8
Supplementary Table S8: List of FDA approved, Clinical and Pre-clinical drugs used in our study for docking.
S. No.	Drugs	ZINC ID	Status
1	Chloroquine	ZINC19144231	Approved
2	Dabrafenib	ZINC68153186	Approved
3	Captopril	ZINC57001	Approved
4	Lisinopril	ZINC3812863	Approved
5	Camostat	ZINC3871842	Approved
6	Nafamostat	ZINC3874467	Approved
7	Chloramphenicol	ZINC113382	Approved
8	Tigecycline	ZINC14879972	Approved
9	Linezolid	ZINC2008866	Approved
10	Minoxidil	ZINC1735	Approved
11	Selinexor	ZINC96170454	Approved
12	Silmitasertib	ZINC58638454	Approved
13	Valproic Acid	ZINC3008621	Approved
14	Haloperidol	ZINC537822	Approved
15	Loratadine	ZINC537931	Approved
16	Entacapone	ZINC35342787	Approved
17	Indomethacin	ZINC601283	Approved
18	Metformin	ZINC12859773	Approved
19	Ponatinib	ZINC000036701290	Approved
20	Migalastat	ZINC1636704	Approved
21	Mycophenolic acid	ZINC000000001758	Approved
22	Ribavirin	ZINC1035331	Approved
23	Azacitidine	ZINC3861768	Approved
24	Ruxolitinib	ZINC43207851	Approved
25	Daunorubicin	ZINC3917708	Approved
26	S-verapamil	ZINC3812888	Approved
27	EGCG	ZINC3870412	Approved
28	Quercetin	ZINC3869685	Approved
29	Rapamycin	ZINC169289388	Approved
30	Anisomysin	ZINC954	Approved
31	Sapanisertib	ZINC73069271	Clinical
32	Pevonedistat	ZINC58660702	Clinical
33	RVX-208	ZINC43199551	Clinical
34	E-52862	ZINC95000617	Clinical
35	Merimepodib	ZINC3975663	Clinical
36	ABBV-744	ZINC1250228389	Clinical
37	CPI-0610	ZINC200480149	Clinical
38	CB5083	ZINC208076131	Clinical
39	Tomivosertib	ZINC575623807	Clinical
40	Bafilomycin A1	ZINC000169647947	Pre-Clinical
41	CCT 365623	ZINC1776011385	Pre-Clinical
42	AZ8838	ZINC914431265	Pre-Clinical
43	AZ3451	ZINC914431341	Pre-Clinical
44	4E2RCat	ZINC7018722	Pre-Clinical
45	DBeQ	ZINC39389	Pre-Clinical
46	ML240	ZINC96021026	Pre-Clinical
47	JQ1	ZINC57318556	Pre-Clinical
48	TMCB	ZINC000058638742	Pre-Clinical
49	Apicidin	ZINC17654900	Pre-Clinical
50	RS-PPCC	ZINC28635556	Pre-Clinical
51	PB28	ZINC22931094	Pre-Clinical
52	H-89	ZINC2043204	Pre-Clinical
53	ZINC4326719	ZINC4326719	Pre-Clinical
54	ZINC4511851	ZINC4511851	Pre-Clinical
55	ZINC95559591	ZINC95559591	Pre-Clinical
56	AC-55541	ZINC13302309	Pre-Clinical
57	GB110	ZINC64527010	Pre-Clinical
58	UCPH-101	ZINC000040914195	Pre-Clinical
