# Supplementary material for: Proteomics and Machine Learning Approaches Reveal a Set of Prognostic Markers for COVID-19 Severity With Drug Repurposing Potential
Source: Front Physiol. 2021 Apr 27;12:652799. doi: 10.3389/fphys.2021.652799 (PMC8120435; doi:10.3389/fphys.2021.652799)
Supplement: Supplementary Table 9 — The potential drug binding to proteins up-regulated in COVID-19 severe. [file Table_9.xlsx]

## Sheet: Supplementary Table S9
SupplementaryTable S9: The following drugs are identified as potential drugs to target proteins from non-severe vs severe comparison.
	These drugs have equal or higher binding affinity and similar binding pose than the control drug.
Status	Compound Name	Proteins from Non-severe vs Severe comparison
		Carbonic Anhydrase-2	Thyroxine-binding globulin	Carbonic Anhydrase-1	Angiotensinogen	Heparin Co factor 2
Approved	Indomethacin		√			√
Approved	Linezolid		√			√
Approved	Ponatinib		√			√
Approved	Selinexor		√			√
Approved	Quercetin		√			√
Approved	EGCG			√		√
Approved	Nafamostat	√				√
Approved	Entacapone	√				√
Clinical	Sapanisertib		√			√
Clinical	CPI-0610		√	√
Clinical	Pevonedistat		√			√
Pre-Clinical	AC-55541		√	√		√
Pre-Clinical	DBeQ		√	√		√
Pre-Clinical	Apicidin		√	√		√
Pre-Clinical	Bafilomycin A1		√	√		√
Pre-Clinical	ML240		√	√	√
Pre-Clinical	4E2RCat	√	√			√
Pre-Clinical	UCPH-101		√			√
Pre-Clinical	ZINC4326719		√			√
Pre-Clinical	GB110		√	√
