# Supplementary material for: Proteomics and Machine Learning Approaches Reveal a Set of Prognostic Markers for COVID-19 Severity With Drug Repurposing Potential
Source: Front Physiol. 2021 Apr 27;12:652799. doi: 10.3389/fphys.2021.652799 (PMC8120435; doi:10.3389/fphys.2021.652799)
Supplement: Supplementary Table 10 — The list of potential drug binding to the target proteins. [file Table_10.xlsx]

## Sheet: Supplementary Table S10
Supplementary Table S10: The potential drugs identified for the proteins. The control drug is highlighted in grey.
	Only those drugs are listed if they have equal or higher binding affinity and similar binding pocket than the control drug.
1. Glutathione S-transferase omega-1 (P78417)
S. No	Drugs	ZINC ID	Binding affinity (Kcal/mol)	Status	Residues interacting	Hydrophobic contacts	Hydrogen-Bonds	Salt-Bridges
1	CMFDA		-8.3	Control	F34, L56, L71, W222, F31, K59, K57	4	3	1
2	RS-PPCC	ZINC28635556	-8.3	Pre-Clinical	P33, F34, L56, L71, I131, W222, F225, L226, Y229, V72, R132	9	3	0
3	Silmitasertib	ZINC58638454	-8.3	Approved	P33, F34, L56, L71, V72, W222, R183	6	1	0
4	Pevonedistat	ZINC58660702	-8.3	Clinical	P33, F34, V127, I131, W222, L226, Y229, L56, L57	7	2	0
5	UCPH-101	ZINC000040914195	-8.6	Pre-Clinical	P33, V127, I131, W222, F225, Y229, K59	6	1	0
6	Selinexor	ZINC96170454	-8.6	Approved	F34, L56, V127, I131, V72, P124	6	3	0
7	Rapamycin	ZINC169289388	-8.8	Approved	L56, F225, K57, P124, G128, Y229	2	4	0
8	Merimepodib	ZINC3975663	-8.8	Clinical	F34, L71, Y229, R37, V72, E85, S86, A87, R132	6	6	0
9	GB110	ZINC64527010	-8.8	Pre-Clinical	F34, L56, L71, I131, W222, F225, L226, Y229, S125, G128	13	3	0
10	Ponatinib	ZINC000036701290	-9.1	Approved	F34, L71, R37	3	1	0
11	Bafilomycin A1	ZINC000169647947	-9.1	Pre-Clinical	P33, V127, W222, F225, K57, R132	4	3	0
12	CB5083	ZINC208076131	-9.2	Clinical	P33, F34, L71, V127, W222, F31	8	2	0
13	ABBV-744	ZINC1250228389	-9.6	Clinical	F34, L56, L71, V72, I131, F225, L226, Y229, P124	10	2	0
14	AC-55541	ZINC13302309	-9.7	Pre-Clinical	F34, L56, L71, W222, F225, Y229	10	0	0
15	ML240	ZINC96021026	-9.7	Pre-Clinical	F34, L56, L71, V127, I131, F31	9	1	0
2. Carbonic Anhydrase-2 (P00918)
1	Acetazolamide		-6.3	Control	L198, H119, T199, T200, E106	1	4	1
2	Ribavirin	ZINC1035331	-6.4	Approved	T200, N62, N67, Q92, H94, T199	1	8	0
3	Entacapone	ZINC35342787	-6.6	Approved	L198, H119, T199, T200	2	3	0
4	Azacitidine	ZINC3861768	-6.8	Approved	N62, N67, Q92, H96, T199, T200	0	8	0
5		ZINC3812887	-7.1		H64, Q92, H119, T199, T200,	0	8	0
6	ZINC95559591	ZINC95559591	-8	Pre-Clinical	I91, V121, V143, L198, W209, Q92, H96, T200	6	3	0
7	Nafamostat	ZINC3874467	-8.2	Approved	V121, F131, L198, Q92, H96, T199, P201	4	4	0
8	4E2RCat	ZINC7018722	-8.3	Pre-Clinical	F20, V121, F131, L198, P201, H96, T199, T200, H64	5	3	1
3. Carboxy peptidase B2 (Q96IY4)
1	Anabaenopeptin F	ZINC000095606377	-8.3	Control	V52, T58, D60, W238, E50, A59, G268, T277	4	7	2
2	Daunorubicin	ZINC3917708	-8.6	Approved	W238, I251, Y49, K240	2	2	0
3	AZ3451	ZINC914431341	-8.6	Pre-Clinical	W238, I251, A59, R242, E276	3	3	1
	Rapamycin	ZINC169289388	-8.7	Approved	V52, W238, K240, E276	3	1	0
	Dabrafenib	ZINC68153186	-8.8	Approved	E276, T46, I51, A59	1	3	1
	4E2RCat	ZINC7018722	-8.8	Pre-Clinical	V52, T58, E276, T277	3	2	0
4. Carbonic Anhydrase 1 (P00915)
1	Topiramate		-9.2	Control	Q92, T199, H200	0	4	0
2	AC-55541	ZINC000013302309	-9.9	Pre-Clinical	F91, Q92, A121, L198, T199, H200, P201, P202	5	5	0
3	Bafilomycin A1	ZINC000169647947	-9.3	Pre-Clinical	F91, Q92, A121, L131, L141, V143, L198, H200	8	1	0
4	ML240	ZINC000096021026	-9.2	Pre-Clinical	F91, Q92, A121, L131, L141, V143, L198, H200	8	1	0
5	DBeQ	ZINC000000039389	-9.3	Pre-Clinical	F91, H94, A121, L131, A135, V143, L198, H200, W209	10	0	0
6	Apicidin	ZINC000017654900	-9.4	Pre-Clinical	W5, Q92, A121, V143, L198, H200	5	1	0
7	GB110	ZINC000064527010	-9.6	Pre-Clinical	W5, I60, L131, L141, R173, L198, T199, H200	5	4	0
8	EGCG	ZINC3870412	-9.5	Approved	S65, F66, F91, Q92, H94, H96, H119, L198, T199, H200	5	10	0
9	CPI-0610	ZINC000200480149	-9.4	Clinical	H64, F91, H96, A121, L198, T199	4	4	0
10	CB5083	ZINC000208076131	-9.2	Clinical	V62, Q92, H119, A121, L131, V143, L198, T199, W209	8	2	0
5. Heparin cofactor 2 (P05546)
1	Sulodexide		-7.1	Control	K101, N108, E360, Q363	1	3	0
2	AC-55541	ZINC000013302309	-9.1	Pre-Clinical	I109, Q327, V359, Q363, K364, Y461, H463, S466	7	4	0
3	Bafilomycin A1	ZINC000169647947	-8.4	Pre-Clinical	L314, Q363, Y461	3	0	0
4	Selinexor	ZINC000096170454	-8.7	Approved	K101, I109, Q327, P356, Q363, Y461, H463, S466	4	6	0
5	4E2RCat	ZINC000007018722	-8.3	Pre-Clinical	K101, V359, Y461, R464, S466	4	3	1
6	Pevonedistat	ZINC000058660702	-8.5	Clinical	I109, A112, V359, E360, Q363, M366	5	3	0
7	UCPH-101	ZINC000040914195	-8.2	Pre-Clinical	K101, L314, Q363, H463	2	2	0
8	DBeQ	ZINC000000039389	-8.8	Pre-Clinical	K101, I109, A112, V359, E360, Q363, K364, Y461	11	2	0
9	Apicidin	ZINC000017654900	-8.6	Pre-Clinical	K101, Q105, V359, E360, Q363, Y461, H463, R464, S466	7	5	1
10	Ponatinib	ZINC000036701290	-8.4	Approved	L314, E329, E360, Q363, Y461	3	3	2
11	RS-PPCC	ZINC000028635556	-7.5	Pre-Clinical	A112, P356, V359, Q363, Y461	7	1	0
12	ZINC4326719	ZINC4326719	-7.3	Pre-Clinical	K101, Q105, I109, V359, Q363, Y461, S466	3	5	0
13	EGCG	ZINC3870412	-7.7	Approved	K101, Q363, Y461, H463	2	2	0
14	Nafamostat	ZINC3874467	-8.1	Approved	E329, V359, Q363, H463	3	1	0
6. Thyroxine-binding globulin (P05543)
1	Tamoxifen		-7.4	Control	L246, L248, L269, N273, L276, R378, R381,	10	0	0
2	AC-55541	ZINC13302309	-9.2	Pre-Clinical	Y225, L276, L376, R381, Q238, L269, R378	7	4	0
3	Bafilomycin A1	ZINC000169647947	-8.2	Pre-Clinical	L246, L376, R378,	4	2	0
4	Selinexor	ZINC96170454	-9.3	Approved	L246, L269, K270, L376, Y20, S24, R381, N273, E377, R387,	6	6	0
5	ML240	ZINC96021026	-8.2	Pre-Clinical	Y225, L246, L248, L269, N273, L276, L376, R381, R378, R381	9	4	0
6	4E2RCat	ZINC7018722	-8.3	Pre-Clinical	Y225, L269, L276, L376, R378, R381	6	1	0
7	Pevonedistat	ZINC58660702	-8.6	Clinical	A27, L246, L269, R381, Y225, Q238, R378	4	3	0
8	UCPH-101	ZINC000040914195	-8.1	Pre-Clinical	L269, K270, N273, L376, R381,	7	4	0
9	DBeQ	ZINC39389	-8.3	Pre-Clinical	L248, L269, K270, L276, R381	5	1	0
10	Apicidin	ZINC17654900	-7.6	Pre-Clinical	Y225, L248, L276, L376, R381, N273, R378,	5	4	0
11	Ponatinib	ZINC000036701290	-9.3	Approved	Y225, L246, L248, L269, K270, L276, L376, R381, Q238, N273, R378	10	4	0
12	ZINC4326719	ZINC4326719	-8	Pre-Clinical	L269, K270, L376, S23, R381,	4	4	0
13	GB110	ZINC64527010	-8.7	Pre-Clinical	Y225, L246, L248, K270, L276, Q238, N273, R378, R381	5	6	0
14	CPI-0610	ZINC200480149	-8	Clinical	L248, L269, W272, N273, R378, R381	5	2	0
7. S100 A-9 (P06702)
1	Tasquinimod	ZINC602397	-7.5	Control	I12, V15, F71, V75	5	0	0
2	Rapamycin	ZINC169289388	-8.2	Approved	I12. V15, P43, Y45, F71, V75, A82, K85, Y45	9	1	0
3	Bafilomycin A1	ZINC000169647947	-7.7	Pre-Clinical	V15, V75, M78, A8, G79, H83	3	3	0
4	AC-55541	ZINC13302309	-7.6	Pre-Clinical	L9, I12, V15, L72, V75, I76, M78, G79	8	1	0
5	Selinexor	ZINC96170454	-7.5	Approved	L37, E41, F71, V75, M78	4	2	1
8. 6-Phosphogluconate dehydrogenase (P52209)
1	Physcion		-7	Control	L290, A287	1	1	0
2	ZINC4326719	ZINC4326719	-7	Pre-Clinical	R288	0	1	0
3	RS-PPCC	ZINC28635556	-7.5	Pre-Clinical	Y202, L251, D256, A287, P419, H203	5	1	0
4	EGCG	ZINC3870412	-7.9	Approved	Y202, L251, D256, A258, Q196, I254, A287, S291	4	9	0
5	DBeQ	ZINC39389	-7.9	Pre-Clinical	H203, A258, A287, R288, L290, P419, P421, Q196, S291	7	3	0
6	Pevonedistat	ZINC58660702	-8	Clinical	Y202, I239, L240, L251	5	0	0
7	AC-55541	ZINC13302309	-8.1	Pre-Clinical	Y202, L251, D256, A287, L290, P419	6	2	0
8	4E2RCat	ZINC7018722	-8.1	Pre-Clinical	Y202, L251, D256, A287, L290, P421	6	0	0
9	CPI-0610	ZINC200480149	-8.2	Clinical	Y202, T236, L251, I254	5	0	0
10	Nafamostat	ZINC3874467	-8.3	Approved	Y202, T236, L251, Q196, P419, E200	4	3	1
11	UCPH-101	ZINC000040914195	-8.4	Pre-Clinical	L251, I254, H203, R297, D256	5	3	1
12	Selinexor	ZINC96170454	-8.5	Approved	Y202, L251, D256, A258, P419, Q196, R255	5	3	0
13	AZ3451	ZINC914431341	-8.8	Pre-Clinical	I198, Y202, L232, T236, L240, L251, A287, Q196, S291	10	3	0
14	Ponatinib	ZINC000036701290	-9	Approved	Y202, L251, A287, L290, T236	4	1	0
15	ML240	ZINC96021026	-9.1	Pre-Clinical	H203, D256, A287, L290, P421, Q196, S291	5	2	0
16	Apicidin	ZINC17654900	-9.2	Pre-Clinical	I198, Y202, T236, I239, L240, L251, A258, Q196, R255	8	2	0
17	CB5083	ZINC208076131	-9.2	Clinical	Y202, T236, I239, L240, L251, I254, A258, Q196, A287	8	2	0
18	Bafilomycin A1	ZINC000169647947	-9.4	Pre-Clinical	Y202, L251, D256, Q196, A287, S291	4	3	0
19	GB110	ZINC64527010	-9.5	Pre-Clinical	Y202, L232, I235, L251, A287, P419, Q196, T236, R288, S291	6	4	0
20	Rapamycin	ZINC169289388	-10.3	Approved	L251, D256, P419, Q196	3	2	0
9. Angiotensinogen (P01019)
1	Irbesartan		-8.4	Control	D53, V56, L57, A59, A60, V159, Q161, G162, A168	12	2	1
2	ML240	ZINC000096021026	-8.9	Pre-Clinical	Q52, V56, L57, A60, S166	4	1	0
