# Supplementary material for: Proteomics and Machine Learning Approaches Reveal a Set of Prognostic Markers for COVID-19 Severity With Drug Repurposing Potential
Source: Front Physiol. 2021 Apr 27;12:652799. doi: 10.3389/fphys.2021.652799 (PMC8120435; doi:10.3389/fphys.2021.652799)
Supplement: Supplementary Table 11 — The list of proteins selected for docking. [file Table_11.xlsx]

## Sheet: Supplementary Table S11
Supplementary Table S11: Details of proteins selected for docking studies
S. No.	Protein	UNIPROT ID	PDB ID	Length	Control Inhibitor	Pathway
1	Glutathione S-transferase omega-1	P78417	1EEM	241	CMFDA	Lipid metabolism
2	Carbonic Anhydrase-2	P00918	1AM6	260	Acetazolamide	Response to stress
3	Carboxy peptidase B2	Q96IY4	4P10	423	Anabaenopeptin F	Platelet activation and degranulation
4	Carbonic Anhydrase-1	P00915	3LXE	261	Topiramate	Lipid metabolism
5	Heparin cofactor 2	P05546	1JMJ	499	Sulodexide	Platelet activation and degranulation
6	Thyroxine-binding globulin	P05543	2CEO	415	Tamoxifen	regulation of vasoconstriction
7	S100 A-9	P06702	1XK4	114	Tasquinimod	Interleukin IL-6 signalling pathway
8	6-Phosphogluconate dehydrogenase	P52209	5UQ9	483	Physcion	Glucose metabolism
9	Angiotensinogen	P01019	2WXW	485	Irbesartan	Lipid metabolism
