# Supplementary material for: Proteomics and Machine Learning Approaches Reveal a Set of Prognostic Markers for COVID-19 Severity With Drug Repurposing Potential
Source: Front Physiol. 2021 Apr 27;12:652799. doi: 10.3389/fphys.2021.652799 (PMC8120435; doi:10.3389/fphys.2021.652799)
Supplement: Supplementary Table 12 — The potential drugs binding to proteins upregulated in COVID-19 positive. [file Table_12.xlsx]

## Sheet: Supplementary Table S12
Supplementary Table S12: The following drugs are identified as potential drugs to target proteins from Covid-19 positive vs negative comparison.
	These drugs have equal or higher binding affinity and similar binding pose than the control drug.
Status	Compound Name	Proteins from SARS CoV-2 positive vs negative comparison
		Carboxy Peptidase B2	Glutathione S-transferase omega-1	S 100 A-9	6-Phosphogluconate dehydrogenase
Approved	Rapamycin	√	√	√	√
Approved	Selinexor		√	√	√
Approved	Daunorubicin	√			√
Approved	Dabrafenib	√			√
Approved	Silmitasertib		√		√
Approved	Ponatinib		√		√
Clinical	CB5083		√		√
Clinical	Merimepodib		√		√
Clinical	ABBV-744		√		√
Clinical	Pevonedistat		√		√
Pre-Clinical	GB110		√		√
Pre-Clinical	UCPH-101		√		√
Pre-Clinical	RS-PPCC		√		√
Pre-Clinical	ML240		√		√
Pre-Clinical	4E2RCat	√			√
Pre-Clinical	AZ3451	√			√
Pre-Clinical	AC-55541		√	√	√
Pre-Clinical	Bafilomycin A1		√	√	√
